# Supplementary material for: Effect of chronic alcohol consumption on oral microbiota in rats with periodontitis
Source: PeerJ journal article supplement (doi:10.7717/peerj.17795), 2024-08-12
Supplement: raw_data.zip [file LDA.res.xls]

Biomarker(Clickable)	log10(avg)	Enrich Group	LDA Score	Pvalue
k__Bacteria.p__Proteobacteria.c__Gammaproteobacteria.o__Pseudomonadales.f__Moraxellaceae	4.44335026244	P	4.01561752799	0.0376669222286
k__Bacteria.p__Proteobacteria.c__Gammaproteobacteria.o__Pseudomonadales.f__Moraxellaceae.g__Acinetobacter	4.42579435203	P	4.00785874106	0.0433081428108
k__Bacteria.p__Bacteroidota.c__Bacteroidia.o__Chitinophagales.f__Chitinophagaceae	2.08883889787	PA	3.32820355001	0.0147316878975
k__Bacteria.p__Proteobacteria.c__Gammaproteobacteria.o__Enterobacterales.f__Pasteurellaceae.g__Haemophilus	4.17652703798	P	3.88186619694	0.0361690889476
k__Bacteria.p__Actinobacteriota.c__Actinobacteria.o__Propionibacteriales.f__Propionibacteriaceae.g__Cutibacterium	3.67960017821	PA	3.52946079821	0.0390369400177
k__Bacteria.p__Actinobacteriota.c__Actinobacteria.o__Propionibacteriales	3.68166972514	PA	3.52823699941	0.014021288808
k__Bacteria.p__Firmicutes.c__Clostridia.o__Lachnospirales.f__Lachnospiraceae	3.73679678946	PA	3.49217210638	0.0299871943559
k__Bacteria.p__Firmicutes.c__Clostridia.o__Peptostreptococcales_Tissierellales.f__Peptostreptococcaceae	3.25093271451	PA	3.00320756196	0.0275572376766
k__Bacteria	6.0	P	4.37200496605	0.0328692343007
k__Bacteria.p__Firmicutes.c__Bacilli.o__Lactobacillales.f__Streptococcaceae.g__Streptococcus.s__Streptococcus_mutans	3.90935547968	P	3.63357634271	0.00485574405352
k__Bacteria.p__Bacteroidota.c__Bacteroidia.o__Sphingobacteriales.f__Sphingobacteriaceae.g__Sphingobacterium	1.78755322602	P	3.50511858635	0.0147316878975
k__Bacteria.p__Firmicutes.c__Clostridia.o__Lachnospirales	3.73689249094	PA	3.49226908162	0.0299871943559
k__Bacteria.p__Firmicutes.c__Clostridia.o__Peptostreptococcales_Tissierellales.f__Family_XI	3.73412738345	PA	3.5786752134	0.0147316878975
k__Bacteria.p__Bacteroidota.c__Bacteroidia.o__Chitinophagales	2.08883889787	PA	3.30521053495	0.0147316878975
k__Bacteria.p__Firmicutes.c__Clostridia.o__Peptostreptococcales_Tissierellales	3.85965250727	PA	3.66229978282	0.0174306504143
k__Bacteria.p__Firmicutes.c__Clostridia	4.43558729659	PA	4.16549560249	0.0403606091091
k__Bacteria.p__Actinobacteriota.c__Actinobacteria.o__Propionibacteriales.f__Propionibacteriaceae	3.68134360951	PA	3.53313013498	0.014048867358
