# Supplementary material for: Effect of chronic alcohol consumption on oral microbiota in rats with periodontitis
Source: PeerJ journal article supplement (doi:10.7717/peerj.17795), 2024-08-12
Supplement: raw_data.zip [file PA-vs-P.psig.xls]

Taxa	mean(group1)	variance(group1)	standard error(group1)	mean(group2)	variance(group2)	standard error(group2)	p value	q value
k__Bacteria;p__Proteobacteria;c__Gammaproteobacteria;o__Enterobacterales;f__Pasteurellaceae;g__Haemophilus;	0.000828308183540591	7.84959230238488e-06	0.000808784700563386	0.0150177443088375	0.000460442783937478	0.00619437099266663	0.018981018981019	0.0674431951027696
k__Bacteria;p__Actinobacteriota;c__Actinobacteria;o__Propionibacteriales;f__Propionibacteriaceae;g__Cutibacterium;	0.00477990324783366	0.000179490380054006	0.00386749682238618	8.41532261942545e-06	4.71416967315363e-10	6.2677545641386e-06	0.013986013986014	0.0569674228210814
k__Bacteria;p__Firmicutes;c__Clostridia;o__Peptostreptococcales-Tissierellales;f__Family_XI;g__Tissierella;	0.00401170451157467	0.000174600122742075	0.00381444756531089	0	0	0	0.000999000999000999	0.00490685784803432
k__Bacteria;p__Actinobacteriota;c__Actinobacteria;o__Corynebacteriales;f__Corynebacteriaceae;g__Lawsonella;	0.000793444704117257	7.45536316272456e-06	0.000788213336324868	0	0	0	0.000999000999000999	0.00490685784803432
k__Bacteria;p__Actinobacteriota;c__Actinobacteria;o__Actinomycetales;f__Actinomycetaceae;g__Actinomyces;	0.00149191648152957	6.56111986192558e-06	0.000739432206827508	0.000113005760889427	3.52979366697537e-08	5.42355485127557e-05	0.033966033966034	0.105043105043105
k__Bacteria;p__Firmicutes;c__Clostridia;o__Peptostreptococcales-Tissierellales;f__Family_XI;g__Anaerococcus;	0.000657597353260817	4.9661097209535e-06	0.000643305896713317	0	0	0	0.000999000999000999	0.00490685784803432
k__Bacteria;p__Firmicutes;c__Clostridia;o__Peptostreptococcales-Tissierellales;f__Family_XI;g__Peptoniphilus;	0.000605903228598632	4.2737810868308e-06	0.000596781722158585	0	0	0	0.000999000999000999	0.00490685784803432
k__Bacteria;p__Firmicutes;c__Clostridia;o__Peptostreptococcales-Tissierellales;f__Peptostreptococcaceae;g__Romboutsia;	0.00176601556113371	4.64356591658725e-06	0.000622064165807894	0.000271694701712879	1.67130716398989e-07	0.000118015082510312	0.018981018981019	0.0674431951027696
k__Bacteria;p__Proteobacteria;c__Gammaproteobacteria;o__Burkholderiales;f__Sutterellaceae;g__Parasutterella;	0.000930494243919328	3.0982406013376e-06	0.000508120769874775	6.85247699010358e-05	3.75083934863963e-09	1.76796477826898e-05	0.023976023976024	0.0834165834165834
k__Bacteria;p__Firmicutes;c__Clostridia;o__Clostridiales;f__Clostridiaceae;g__Clostridium_sensu_stricto_1;	0.00070808928897737	1.83315138844437e-06	0.000390848584113717	3.60656683689662e-06	1.5608789218803e-10	3.60656683689662e-06	0.001998001998002	0.00914154338811873
k__Bacteria;p__Proteobacteria;c__Alphaproteobacteria;o__Rhodospirillales;f__unidentified_Rhodospirillales;g__unidentified_Rhodospirillales;	0.000329399771103225	1.0750135763426e-06	0.000299306639911675	0	0	0	0.000999000999000999	0.00490685784803432
k__Bacteria;p__Desulfobacterota;c__Desulfovibrionia;o__Desulfovibrionales;f__Desulfovibrionaceae;g__Desulfovibrio;	0.000330601960048857	1.03534360204621e-06	0.000293732247980794	1.20218894563221e-06	1.73430991320033e-11	1.20218894563221e-06	0.036963036963037	0.113262883905086
k__Bacteria;p__Firmicutes;c__Bacilli;o__Lactobacillales;f__Lactobacillaceae;g__Weissella;	0.000372678573145984	9.90253120948375e-07	0.000287264848897954	0	0	0	0.000999000999000999	0.00490685784803432
k__Bacteria;p__Firmicutes;c__Clostridia;o__Oscillospirales;f__Oscillospiraceae;g__Oscillibacter;	0.000468853688796561	8.84971049344861e-07	0.00027156507037063	0	0	0	0.000999000999000999	0.00490685784803432
k__Bacteria;p__Actinobacteriota;c__Actinobacteria;o__Corynebacteriales;f__Nocardiaceae;g__Rhodococcus;	0.000236831222289545	6.73068334213917e-07	0.000236831222289545	0	0	0	0.000999000999000999	0.00490685784803432
k__Bacteria;p__Firmicutes;c__Bacilli;o__Erysipelotrichales;f__Erysipelotrichaceae;g__Turicibacter;	0.000488088711926676	6.91094120793571e-07	0.000239981617489335	3.12569125864374e-05	5.63177728177417e-09	2.16636740531513e-05	0.023976023976024	0.0834165834165834
k__Bacteria;p__Bacteroidota;c__Bacteroidia;o__Bacteroidales;f__Marinifilaceae;g__Odoribacter;	0.00071890898948806	1.16722841107284e-06	0.000311879839451142	4.20766130971272e-05	9.89344973212008e-09	2.87133095330953e-05	0.032967032967033	0.102906439355037
k__Bacteria;p__Proteobacteria;c__Gammaproteobacteria;o__Steroidobacterales;f__Woeseiaceae;g__Woeseia;	0.000179126152899199	3.85034143829606e-07	0.000179126152899199	0	0	0	0.000999000999000999	0.00490685784803432
k__Bacteria;p__Proteobacteria;c__Alphaproteobacteria;o__Rhizobiales;f__Beijerinckiaceae;g__1174-901-12;	0	0	0	0.000270492512767247	4.39056320980421e-07	0.000191279969542993	0.000999000999000999	0.00490685784803432
k__Bacteria;p__Verrucomicrobiota;c__Verrucomicrobiae;o__Chthoniobacterales;f__Chthoniobacteraceae;g__Chthoniobacter;	0.00016349769660598	3.15669630528471e-07	0.000162190636425286	0	0	0	0.000999000999000999	0.00490685784803432
k__Bacteria;p__Firmicutes;c__Bacilli;o__Lactobacillales;f__Lactobacillaceae;g__Lactiplantibacillus;	0.000158688940823451	2.97229186215024e-07	0.000157382015653797	0	0	0	0.000999000999000999	0.00490685784803432
k__Bacteria;p__Elusimicrobiota;c__Elusimicrobia;o__Elusimicrobiales;f__Elusimicrobiaceae;g__Elusimicrobium;	0.000149071429258394	2.62013235104804e-07	0.000147764800472689	0	0	0	0.000999000999000999	0.00490685784803432
k__Bacteria;p__Proteobacteria;c__Alphaproteobacteria;o__Rhodobacterales;f__Rhodobacteraceae;g__Paracoccus;	0.000156284562932187	2.47085556688276e-07	0.000143493773583931	0	0	0	0.000999000999000999	0.00490685784803432
k__Bacteria;p__Campylobacterota;c__Campylobacteria;o__Campylobacterales;f__Helicobacteraceae;g__Helicobacter;	0.0001418582955846	2.41485312314014e-07	0.0001418582955846	0	0	0	0.000999000999000999	0.00490685784803432
k__Bacteria;p__Bacteroidota;c__Bacteroidia;o__Bacteroidales;f__Muribaculaceae;g__Muribaculum;	0.000140656106638968	2.37409684017994e-07	0.000140656106638968	0	0	0	0.000999000999000999	0.00490685784803432
k__Bacteria;p__Campylobacterota;c__Campylobacteria;o__Campylobacterales;f__Campylobacteraceae;g__Campylobacter;	0.000138251728747704	2.29362486020744e-07	0.000138251728747704	0	0	0	0.000999000999000999	0.00490685784803432
k__Bacteria;p__Proteobacteria;c__Gammaproteobacteria;o__Ectothiorhodospirales;f__Thioalkalispiraceae;g__Thioalkalispira-Sulfurivermis;	0.000137049539802072	2.25390916319515e-07	0.000137049539802072	0	0	0	0.000999000999000999	0.00490685784803432
k__Bacteria;p__Firmicutes;c__Clostridia;o__Peptostreptococcales-Tissierellales;f__Family_XI;g__Finegoldia;	0.000138251728747704	2.1256175289796e-07	0.000133091996033433	0	0	0	0.000999000999000999	0.00490685784803432
k__Bacteria;p__Proteobacteria;c__Alphaproteobacteria;o__Caulobacterales;f__Caulobacteraceae;g__Brevundimonas;	8.41532261942545e-06	3.20059011254243e-10	5.16445391800401e-06	0.000323388826375064	2.72234627075056e-07	0.000150619450679258	0.015984015984016	0.058028927594145
k__Bacteria;p__Firmicutes;c__Bacilli;o__Erysipelotrichales;f__Erysipelatoclostridiaceae;g__Erysipelatoclostridium;	0.000129836406128278	2.02289908275687e-07	0.000129836406128278	0	0	0	0.000999000999000999	0.00490685784803432
k__Bacteria;p__Firmicutes;c__Clostridia;o__Lachnospirales;f__Lachnospiraceae;g__Coprococcus;	0.000127432028237014	1.94867061847189e-07	0.000127432028237014	0	0	0	0.000999000999000999	0.00490685784803432
k__Bacteria;p__Bacteroidota;c__Bacteroidia;o__Flavobacteriales;f__Weeksellaceae;g__Bergeyella;	0.000108197005106899	1.40479102969227e-07	0.000108197005106899	0	0	0	0.000999000999000999	0.00490685784803432
k__Bacteria;p__Actinobacteriota;c__Actinobacteria;o__Streptosporangiales;f__Streptosporangiaceae;g__Nonomuraea;	0.000100983871433105	1.22372907475416e-07	0.000100983871433105	0	0	0	0.000999000999000999	0.00490685784803432
k__Archaea;p__Euryarchaeota;c__Methanobacteria;o__Methanobacteriales;f__Methanobacteriaceae;g__Methanobrevibacter;	0.000109399194052531	1.10319453578673e-07	9.58816343113882e-05	0	0	0	0.000999000999000999	0.00490685784803432
k__Bacteria;p__Firmicutes;c__Clostridia;o__Oscillospirales;f__Oscillospiraceae;g__UCG-002;	8.89619819767833e-05	9.49708108468502e-08	8.89619819767833e-05	0	0	0	0.000999000999000999	0.00490685784803432
k__Bacteria;p__Firmicutes;c__Clostridia;o__Lachnospirales;f__Lachnospiraceae;g__Roseburia;	9.256854881368e-05	8.9205018708147e-08	8.62192064392398e-05	0	0	0	0.000999000999000999	0.00490685784803432
k__Bacteria;p__Actinobacteriota;c__Actinobacteria;o__Micrococcales;f__Micrococcaceae;g__Kocuria;	8.65576040855189e-05	8.99066259003053e-08	8.65576040855189e-05	0	0	0	0.000999000999000999	0.00490685784803432
k__Bacteria;p__Actinobacteriota;c__Thermoleophilia;o__Gaiellales;f__Gaiellaceae;g__Gaiella;	8.17488483029901e-05	7.51996778363665e-08	7.91621110108694e-05	0	0	0	0.000999000999000999	0.00490685784803432
k__Bacteria;p__Firmicutes;c__Clostridia;o__Lachnospirales;f__Lachnospiraceae;g__Sellimonas;	7.57379035748291e-05	6.88347604549212e-08	7.5737903574829e-05	0	0	0	0.000999000999000999	0.00490685784803432
k__Bacteria;p__Firmicutes;c__Bacilli;o__Bacillales;f__Bacillaceae;g__Geobacillus;	7.33335256835646e-05	6.45336718701844e-08	7.33335256835646e-05	0	0	0	0.000999000999000999	0.00490685784803432
k__Bacteria;p__Bdellovibrionota;c__Bdellovibrionia;o__Bdellovibrionales;f__Bdellovibrionaceae;g__OM27_clade;	7.33335256835646e-05	6.45336718701844e-08	7.33335256835646e-05	0	0	0	0.000999000999000999	0.00490685784803432
k__Bacteria;p__Firmicutes;c__Clostridia;o__Lachnospirales;f__Lachnospiraceae;g__[Ruminococcus]_torques_group;	6.9726958846668e-05	5.83421854800592e-08	6.9726958846668e-05	0	0	0	0.000999000999000999	0.00490685784803432
k__Bacteria;p__Cyanobacteria;c__Cyanobacteriia;o__Synechococcales;f__Cyanobiaceae;g__Cyanobium_PCC-6307;	6.85247699010358e-05	5.63477290798788e-08	6.85247699010358e-05	0	0	0	0.000999000999000999	0.00490685784803432
k__Bacteria;p__Firmicutes;c__Clostridia;o__Oscillospirales;f__Ruminococcaceae;g__Subdoligranulum;	0.00012502765034575	6.93345570389981e-08	7.6012365791691e-05	0	0	0	0.000999000999000999	0.00490685784803432
k__Bacteria;p__Firmicutes;c__Bacilli;o__Lactobacillales;f__Lactobacillaceae;g__Latilactobacillus;	7.33335256835646e-05	5.2046640495142e-08	6.58575739096259e-05	0	0	0	0.000999000999000999	0.00490685784803432
k__Bacteria;p__Firmicutes;c__Clostridia;o__Lachnospirales;f__Lachnospiraceae;g__[Eubacterium]_hallii_group;	6.61203920097714e-05	5.24628748743101e-08	6.61203920097714e-05	0	0	0	0.000999000999000999	0.00490685784803432
k__Bacteria;p__Firmicutes;c__Clostridia;o__Oscillospirales;f__Ruminococcaceae;g__Pygmaiobacter;	6.49182030641392e-05	5.05724770689217e-08	6.49182030641392e-05	0	0	0	0.000999000999000999	0.00490685784803432
k__Bacteria;p__Myxococcota;c__Polyangia;o__Polyangiales;f__Sandaracinaceae;g__Sandaracinus;	6.3716014118507e-05	4.87167654617974e-08	6.3716014118507e-05	0	0	0	0.000999000999000999	0.00490685784803432
k__Bacteria;p__Chloroflexi;c__Anaerolineae;o__Anaerolineales;f__Anaerolineaceae;g__UTCFX1;	5.89072583359781e-05	4.164078101594e-08	5.89072583359781e-05	0	0	0	0.000999000999000999	0.00490685784803432
k__Bacteria;p__Proteobacteria;c__Alphaproteobacteria;o__Caulobacterales;f__Caulobacteraceae;g__unidentified_Caulobacteraceae;	0	0	0	9.13663598680477e-05	5.01120966192358e-08	6.46220399832981e-05	0.000999000999000999	0.00490685784803432
k__Bacteria;p__Cyanobacteria;c__Cyanobacteriia;o__Synechococcales;f__Cyanobiaceae;g__Synechococcus_CC9902;	5.53006914990815e-05	3.66979977633191e-08	5.53006914990815e-05	0	0	0	0.000999000999000999	0.00490685784803432
k__Bacteria;p__Desulfobacterota;c__Desulfuromonadia;o__Desulfuromonadales;f__Desulfuromonadaceae;g__Desulfuromonas;	5.16941246621849e-05	3.20673902950742e-08	5.16941246621849e-05	0	0	0	0.000999000999000999	0.00490685784803432
k__Bacteria;p__Desulfobacterota;c__Desulfobacteria;o__Desulfobacterales;f__Desulfosarcinaceae;g__Sva0081_sediment_group;	5.16941246621849e-05	3.20673902950742e-08	5.16941246621849e-05	0	0	0	0.000999000999000999	0.00490685784803432
k__Bacteria;p__Firmicutes;c__Bacilli;o__Lactobacillales;f__Carnobacteriaceae;g__Granulicatella;	5.04919357165527e-05	3.05932268688539e-08	5.04919357165527e-05	0	0	0	0.000999000999000999	0.00490685784803432
k__Bacteria;p__Firmicutes;c__Clostridia;o__Oscillospirales;f__Oscillospiraceae;g__unidentified_Oscillospiraceae;	4.68853688796561e-05	2.63788537797771e-08	4.68853688796561e-05	0	0	0	0.000999000999000999	0.00490685784803432
k__Bacteria;p__Firmicutes;c__Clostridia;o__Oscillospirales;f__Butyricicoccaceae;g__Butyricicoccus;	5.04919357165527e-05	2.35929214010271e-08	4.43404644023822e-05	0	0	0	0.000999000999000999	0.00490685784803432
k__Bacteria;p__Bacteroidota;c__Bacteroidia;o__Flavobacteriales;f__Flavobacteriaceae;g__Capnocytophaga;	3.96722352058628e-05	1.88866349547516e-08	3.96722352058628e-05	0	0	0	0.000999000999000999	0.00490685784803432
k__Bacteria;p__Firmicutes;c__Bacilli;o__Acholeplasmatales;f__Acholeplasmataceae;g__Anaeroplasma;	3.84700462602306e-05	1.77593335111714e-08	3.84700462602306e-05	0	0	0	0.000999000999000999	0.00490685784803432
k__Bacteria;p__Firmicutes;c__Clostridia;o__Lachnospirales;f__Lachnospiraceae;g__GCA-900066575;	3.36612904777018e-05	1.35969897194906e-08	3.36612904777018e-05	0	0	0	0.000999000999000999	0.00490685784803432
k__Bacteria;p__Actinobacteriota;c__Actinobacteria;o__Micrococcales;f__Microbacteriaceae;g__Agrococcus;	0	0	0	4.32788020427595e-05	1.26383893311035e-08	3.24530293027522e-05	0.000999000999000999	0.00490685784803432
k__Bacteria;p__Proteobacteria;c__Gammaproteobacteria;o__Xanthomonadales;f__Xanthomonadaceae;g__Pseudoxanthomonas;	0	0	0	3.84700462602306e-05	1.04941516202377e-08	2.95721597963322e-05	0.000999000999000999	0.00490685784803432
k__Bacteria;p__Bacteroidota;c__Bacteroidia;o__Sphingobacteriales;f__Sphingobacteriaceae;g__Sphingobacterium;	0	0	0	6.25138251728748e-05	1.00779172410696e-08	2.89797590872629e-05	0.000999000999000999	0.00490685784803432
k__Bacteria;p__Proteobacteria;c__Gammaproteobacteria;o__Xanthomonadales;f__Rhodanobacteraceae;g__Ahniella;	2.40437789126441e-05	6.93723965280133e-09	2.40437789126441e-05	0	0	0	0.000999000999000999	0.00490685784803432
k__Bacteria;p__Firmicutes;c__Bacilli;o__Lactobacillales;f__Lactobacillaceae;g__Pediococcus;	2.40437789126441e-05	5.57501804825125e-09	2.15542301498864e-05	0	0	0	0.000999000999000999	0.00490685784803432
k__Bacteria;p__Acidobacteriota;c__Acidobacteriae;o__Acidobacteriales;f__Acidobacteriaceae_(Subgroup_1);g__Terriglobus;	0	0	0	2.16394010213797e-05	5.61916411876908e-09	2.16394010213797e-05	0.000999000999000999	0.00490685784803432
k__Bacteria;p__Proteobacteria;c__Alphaproteobacteria;o__Rhodobacterales;f__Rhodobacteraceae;g__Rubellimicrobium;	2.04372120757475e-05	5.01215564914896e-09	2.04372120757475e-05	0	0	0	0.000999000999000999	0.00490685784803432
k__Bacteria;p__Bacteroidota;c__Bacteroidia;o__Bacteroidales;f__Prevotellaceae;g__Prevotella_7;	2.8852534695173e-05	4.88129408297112e-09	2.01686515888956e-05	0	0	0	0.000999000999000999	0.00490685784803432
k__Bacteria;p__Firmicutes;c__Clostridia;o__Lachnospirales;f__Lachnospiraceae;g__[Eubacterium]_ventriosum_group;	2.04372120757475e-05	3.87697097869056e-09	1.79744517271287e-05	0	0	0	0.000999000999000999	0.00490685784803432
k__Bacteria;p__Firmicutes;c__Clostridia;o__Oscillospirales;f__Oscillospiraceae;g__Intestinimonas;	2.76503457495408e-05	4.10400791278224e-09	1.84932598369925e-05	0	0	0	0.000999000999000999	0.00490685784803432
k__Bacteria;p__Proteobacteria;c__Gammaproteobacteria;o__Enterobacterales;f__Alteromonadaceae;g__Rheinheimera;	1.92350231301153e-05	3.38032768536501e-09	1.67837413522855e-05	0	0	0	0.000999000999000999	0.00490685784803432
k__Bacteria;p__Firmicutes;c__Clostridia;o__Lachnospirales;f__Lachnospiraceae;g__Tuzzerella;	1.68306452388509e-05	3.39924742987265e-09	1.68306452388509e-05	0	0	0	0.000999000999000999	0.00490685784803432
k__Bacteria;p__Firmicutes;c__Clostridia;o__Lachnospirales;f__Lachnospiraceae;g__Lachnospiraceae_NK4B4_group;	1.68306452388509e-05	3.39924742987265e-09	1.68306452388509e-05	0	0	0	0.000999000999000999	0.00490685784803432
k__Bacteria;p__Actinobacteriota;c__Coriobacteriia;o__Coriobacteriales;f__Coriobacteriaceae;g__Collinsella;	2.8852534695173e-05	4.69209663789472e-09	1.97739235650868e-05	0	0	0	0.000999000999000999	0.00490685784803432
k__Bacteria;p__Firmicutes;c__Bacilli;o__Lactobacillales;f__Aerococcaceae;g__Eremococcus;	1.44262673475865e-05	2.49740627500848e-09	1.44262673475865e-05	0	0	0	0.000999000999000999	0.00490685784803432
k__Bacteria;p__Firmicutes;c__Clostridia;o__Oscillospirales;f__Ruminococcaceae;g__Fournierella;	1.56284562932187e-05	1.79579908285016e-09	1.22331485550878e-05	0	0	0	0.000999000999000999	0.00490685784803432
k__Bacteria;p__Firmicutes;c__Clostridia;o__Oscillospirales;f__Oscillospiraceae;g__Flavonifractor;	1.20218894563221e-05	1.73430991320033e-09	1.20218894563221e-05	0	0	0	0.00195307216984392	0.00906008478788709
k__Bacteria;p__Firmicutes;c__Clostridia;o__Peptostreptococcales-Tissierellales;f__Peptostreptococcaceae;g__Peptostreptococcus;	1.20218894563221e-05	1.73430991320033e-09	1.20218894563221e-05	0	0	0	0.00195307216984392	0.00906008478788709
k__Bacteria;p__Actinobacteriota;c__Actinobacteria;o__Micrococcales;f__Microbacteriaceae;g__Amnibacterium;	0	0	0	1.68306452388509e-05	1.88566786926145e-09	1.25355091282772e-05	0.000999000999000999	0.00490685784803432
k__Bacteria;p__Fusobacteriota;c__Fusobacteriia;o__Fusobacteriales;f__Fusobacteriaceae;g__Fusobacterium;	1.20218894563221e-05	1.73430991320033e-09	1.20218894563221e-05	0	0	0	0.00195307216984392	0.00906008478788709
k__Bacteria;p__Actinobacteriota;c__Actinobacteria;o__Propionibacteriales;f__Propionibacteriaceae;g__Propioniciclava;	1.20218894563221e-05	1.73430991320033e-09	1.20218894563221e-05	0	0	0	0.00195307216984392	0.00906008478788709
k__Bacteria;p__Firmicutes;c__Bacilli;o__Erysipelotrichales;f__Erysipelotrichaceae;g__Erysipelothrix;	1.08197005106899e-05	1.40479102969227e-09	1.08197005106899e-05	0	0	0	0.00390616547157246	0.0171665693092789
k__Bacteria;p__Firmicutes;c__Negativicutes;o__Acidaminococcales;f__Acidaminococcaceae;g__Acidaminococcus;	1.08197005106899e-05	1.40479102969227e-09	1.08197005106899e-05	0	0	0	0.00390616547157246	0.0171665693092789
k__Bacteria;p__Proteobacteria;c__Alphaproteobacteria;o__Rhodobacterales;f__Rhodobacteraceae;g__Marivita;	1.08197005106899e-05	1.40479102969227e-09	1.08197005106899e-05	0	0	0	0.00390616547157246	0.0171665693092789
k__Bacteria;p__Proteobacteria;c__Alphaproteobacteria;o__Rhizobiales;f__Beijerinckiaceae;g__Microvirga;	0	0	0	1.92350231301153e-05	1.82890863573853e-09	1.2345406148775e-05	0.000999000999000999	0.00490685784803432
k__Bacteria;p__Firmicutes;c__Clostridia;o__Peptostreptococcales-Tissierellales;f__Anaerovoracaceae;g__Anaerovorax;	9.61751156505766e-06	1.10995834444821e-09	9.61751156505766e-06	0	0	0	0.00781236851109781	0.0322139639840329
k__Bacteria;p__Proteobacteria;c__Alphaproteobacteria;o__Rhodobacterales;f__Rhodobacteraceae;g__Ruegeria;	9.61751156505766e-06	1.10995834444821e-09	9.61751156505766e-06	0	0	0	0.00781236851109781	0.0322139639840329
k__Bacteria;p__Firmicutes;c__Clostridia;o__Lachnospirales;f__Lachnospiraceae;g__Agathobacter;	1.68306452388509e-05	1.58295195713921e-09	1.14853238132381e-05	0	0	0	0.000999000999000999	0.00490685784803432
k__Bacteria;p__Proteobacteria;c__Alphaproteobacteria;o__Acetobacterales;f__Acetobacteraceae;g__Komagataeibacter;	9.61751156505766e-06	1.10995834444821e-09	9.61751156505766e-06	0	0	0	0.00781236851109781	0.0322139639840329
k__Bacteria;p__Proteobacteria;c__Gammaproteobacteria;o__Burkholderiales;f__Comamonadaceae;g__Azohydromonas;	0	0	0	9.61751156505766e-06	1.10995834444821e-09	9.61751156505766e-06	0.00781236851109781	0.0322139639840329
k__Bacteria;p__Firmicutes;c__Negativicutes;o__Veillonellales-Selenomonadales;f__Selenomonadaceae;g__Megamonas;	9.61751156505766e-06	8.45081921341253e-10	8.39187067614274e-06	0	0	0	0.00781236851109781	0.0322139639840329
k__Bacteria;p__Proteobacteria;c__Gammaproteobacteria;o__Burkholderiales;f__Comamonadaceae;g__Acidovorax;	8.41532261942545e-06	8.49811857468163e-10	8.41532261942545e-06	0	0	0	0.0156248027663503	0.0573481771863847
k__Bacteria;p__Bacteroidota;c__Bacteroidia;o__Cytophagales;f__Cytophagaceae;g__Sporocytophaga;	0	0	0	8.41532261942545e-06	8.49811857468163e-10	8.41532261942545e-06	0.0156248027663503	0.0573481771863847
k__Bacteria;p__Actinobacteriota;c__Actinobacteria;o__Micrococcales;f__Dermatophilaceae;g__Austwickia;	0	0	0	8.41532261942545e-06	8.49811857468163e-10	8.41532261942545e-06	0.0156248027663503	0.0573481771863847
k__Bacteria;p__Firmicutes;c__Bacilli;o__Erysipelotrichales;f__Erysipelotrichaceae;g__Holdemanella;	8.41532261942545e-06	8.49811857468163e-10	8.41532261942545e-06	0	0	0	0.0156248027663503	0.0573481771863847
k__Bacteria;p__Proteobacteria;c__Alphaproteobacteria;o__Holosporales;f__Holosporaceae;g__Holospora;	8.41532261942545e-06	8.49811857468163e-10	8.41532261942545e-06	0	0	0	0.0156248027663503	0.0573481771863847
k__Bacteria;p__Bacteroidota;c__Bacteroidia;o__Cytophagales;f__Hymenobacteraceae;g__Hymenobacter;	7.21313367379324e-06	6.2435156875212e-10	7.21313367379324e-06	0	0	0	0.0312497182373046	0.0984660933137711
k__Bacteria;p__Bacteroidota;c__Bacteroidia;o__Bacteroidales;f__Rikenellaceae;g__Anaerocella;	7.21313367379324e-06	6.2435156875212e-10	7.21313367379324e-06	0	0	0	0.0312497182373046	0.0984660933137711
k__Bacteria;p__Firmicutes;c__Clostridia;o__Lachnospirales;f__Lachnospiraceae;g__Frisingicoccus;	7.21313367379324e-06	6.2435156875212e-10	7.21313367379324e-06	0	0	0	0.0312497182373046	0.0984660933137711
k__Bacteria;p__Verrucomicrobiota;c__Verrucomicrobiae;o__Chthoniobacterales;f__Chthoniobacteraceae;g__LD29;	0	0	0	7.21313367379324e-06	6.2435156875212e-10	7.21313367379324e-06	0.0312497182373046	0.0984660933137711
k__Bacteria;p__Proteobacteria;c__Alphaproteobacteria;o__Acetobacterales;f__Acetobacteraceae;g__Acetobacter;	7.21313367379324e-06	6.2435156875212e-10	7.21313367379324e-06	0	0	0	0.0312497182373046	0.0984660933137711
k__Bacteria;p__Firmicutes;c__Bacilli;o__Paenibacillales;f__Paenibacillaceae;g__Paenibacillus;	7.21313367379324e-06	6.2435156875212e-10	7.21313367379324e-06	0	0	0	0.0312497182373046	0.0984660933137711
k__Bacteria;p__Bacteroidota;c__Bacteroidia;o__Chitinophagales;f__Chitinophagaceae;g__Terrimonas;	7.21313367379324e-06	6.2435156875212e-10	7.21313367379324e-06	0	0	0	0.0312497182373046	0.0984660933137711
k__Bacteria;p__Proteobacteria;c__Alphaproteobacteria;o__Rhizobiales;f__Xanthobacteraceae;g__Bradyrhizobium;	7.21313367379324e-06	6.2435156875212e-10	7.21313367379324e-06	0	0	0	0.0312497182373046	0.0984660933137711
k__Bacteria;p__Firmicutes;c__Clostridia;o__Lachnospirales;f__Lachnospiraceae;g__Acetatifactor;	7.21313367379324e-06	6.2435156875212e-10	7.21313367379324e-06	0	0	0	0.0312497182373046	0.0984660933137711
k__Bacteria;p__Firmicutes;c__Clostridia;o__Lachnospirales;f__Lachnospiraceae;g__Anaerostipes;	8.41532261942545e-06	4.71416967315363e-10	6.2677545641386e-06	0	0	0	0.0156248027663503	0.0573481771863847
k__Bacteria;p__Proteobacteria;c__Gammaproteobacteria;o__Burkholderiales;f__Comamonadaceae;g__Tepidimonas;	7.21313367379324e-06	4.3515412367572e-10	6.02186380115354e-06	0	0	0	0.0312497182373046	0.0984660933137711
k__Bacteria;p__Actinobacteriota;c__Actinobacteria;o__Micrococcales;f__Microbacteriaceae;g__Leucobacter;	0	0	0	8.41532261942545e-06	4.71416967315363e-10	6.2677545641386e-06	0.0156248027663503	0.0573481771863847
k__Bacteria;p__Firmicutes;c__Clostridia;o__Lachnospirales;f__Lachnospiraceae;g__[Ruminococcus]_gnavus_group;	8.41532261942545e-06	3.95737989284803e-10	5.74266190661906e-06	0	0	0	0.0156248027663503	0.0573481771863847
k__Bacteria;p__Actinobacteriota;c__Actinobacteria;o__Micrococcales;f__Micrococcaceae;g__Micrococcus;	8.41532261942545e-06	3.95737989284803e-10	5.74266190661906e-06	0	0	0	0.0156248027663503	0.0573481771863847
