# Supplementary material for: Effect of chronic alcohol consumption on oral microbiota in rats with periodontitis
Source: PeerJ journal article supplement (doi:10.7717/peerj.17795), 2024-08-12
Supplement: raw_data.zip [file PA-vs-P.test.xls]

Taxa	mean(group1)	variance(group1)	standard error(group1)	mean(group2)	variance(group2)	standard error(group2)	p value	q value
k__Bacteria;p__Proteobacteria;c__Gammaproteobacteria;o__Enterobacterales;f__Pasteurellaceae;g__Rodentibacter;	0.364016801792704	0.0292898998353744	0.0494047061147134	0.34489718880137	0.0112986963918295	0.0306848176245592	0.736263736263736	0.856836543247693
k__Bacteria;p__Firmicutes;c__Negativicutes;o__Veillonellales-Selenomonadales;f__Veillonellaceae;g__Veillonella;	0.0681845504294219	0.00357207808981623	0.0172532076481839	0.128073997133982	0.0194572004458446	0.0402670258460574	0.186813186813187	0.380461002412222
k__Bacteria;p__Proteobacteria;c__Gammaproteobacteria;o__Burkholderiales;f__Burkholderiaceae;g__Ralstonia;	0.0324074074074074	0.0101978146560641	0.0291516361119807	0.00139333698798773	3.60786126275002e-06	0.000548320257905148	0.165834165834166	0.346178821178821
k__Bacteria;p__Bacteroidota;c__Bacteroidia;o__Bacteroidales;f__Bacteroidaceae;g__Bacteroides;	0.0521160929821018	0.00637120244962162	0.0230419950843773	0.030908277792204	0.000878734477203574	0.0085573286193939	0.462537462537463	0.623133953795383
k__Bacteria;p__Actinobacteriota;c__Actinobacteria;o__Micrococcales;f__Micrococcaceae;g__Rothia;	0.0406003250718909	0.00239660582419179	0.0141321318991857	0.0155563249564808	0.000131707203078357	0.003312944348541	0.0629370629370629	0.176646882529235
k__Bacteria;p__Firmicutes;c__Bacilli;o__Lactobacillales;f__Streptococcaceae;g__Streptococcus;	0.0566447387402983	0.00261838390808569	0.014771548971152	0.0609064985525645	0.00129038388175052	0.0103697632637335	0.787212787212787	0.894316567785955
k__Bacteria;p__Proteobacteria;c__Gammaproteobacteria;o__Pseudomonadales;f__Moraxellaceae;g__Acinetobacter;	0.0120844032814949	0.000517841252561496	0.00656912762194936	0.0266573376804486	0.00145102244075631	0.0109962965006266	0.301698301698302	0.468684803568524
k__Bacteria;p__Proteobacteria;c__Gammaproteobacteria;o__Burkholderiales;f__Comamonadaceae;g__Delftia;	0.0107066947498004	0.00116165035955889	0.0098389123702728	0.000131038595073911	4.71275069231556e-08	6.26681118560014e-05	0.326673326673327	0.498214114652471
k__Bacteria;p__Proteobacteria;c__Gammaproteobacteria;o__Xanthomonadales;f__Xanthomonadaceae;g__Stenotrophomonas;	0.00977139175009858	0.000933017639616709	0.00881767939812165	0.000165902074497245	7.00598139117909e-08	7.64088857789628e-05	0.100899100899101	0.258964915681334
k__Bacteria;p__Actinobacteriota;c__Actinobacteria;o__Corynebacteriales;f__Corynebacteriaceae;g__Corynebacterium;	0.0107680063860277	0.000335897188185393	0.00529069299324604	0.00272295796185695	6.95036207226276e-06	0.000761049827117272	0.167832167832168	0.34817356556487
k__Bacteria;p__Proteobacteria;c__Gammaproteobacteria;o__Enterobacterales;f__Pasteurellaceae;g__Haemophilus;	0.000828308183540591	7.84959230238488e-06	0.000808784700563386	0.0150177443088375	0.000460442783937478	0.00619437099266663	0.018981018981019	0.0674431951027696
k__Bacteria;p__Firmicutes;c__Bacilli;o__Lactobacillales;f__Lactobacillaceae;g__Ligilactobacillus;	0.00602657318445425	0.000217340304885028	0.00425578336781283	0.000773007492041509	3.0204031957878e-06	0.000501697385199135	0.285714285714286	0.445927903871829
k__Bacteria;p__Proteobacteria;c__Gammaproteobacteria;o__Pseudomonadales;f__Pseudomonadaceae;g__Pseudomonas;	0.0062634044067438	0.000199366082492384	0.00407600787630479	0.00200525116131452	1.14595378903215e-05	0.000977221311095969	0.423576423576424	0.623133953795383
k__Bacteria;p__Actinobacteriota;c__Actinobacteria;o__Propionibacteriales;f__Propionibacteriaceae;g__Cutibacterium;	0.00477990324783366	0.000179490380054006	0.00386749682238618	8.41532261942545e-06	4.71416967315363e-10	6.2677545641386e-06	0.013986013986014	0.0569674228210814
k__Bacteria;p__Firmicutes;c__Clostridia;o__Peptostreptococcales-Tissierellales;f__Family_XI;g__Tissierella;	0.00401170451157467	0.000174600122742075	0.00381444756531089	0	0	0	0.000999000999000999	0.00490685784803432
k__Bacteria;p__Firmicutes;c__Bacilli;o__Lactobacillales;f__Listeriaceae;g__Listeria;	0.00370995508622099	0.000140209868698302	0.00341820943256239	2.16394010213797e-05	5.61916411876908e-09	2.16394010213797e-05	0.215784215784216	0.403380915100213
k__Bacteria;p__Bacteroidota;c__Bacteroidia;o__Bacteroidales;f__Tannerellaceae;g__Parabacteroides;	0.00411629494984468	9.06398921316064e-05	0.00274833119261499	0.00144983986843244	7.05114282131883e-06	0.000766547607856096	0.484515484515485	0.623133953795383
k__Bacteria;p__Bacteroidota;c__Bacteroidia;o__Bacteroidales;f__Prevotellaceae;g__Prevotellaceae_UCG-001;	0.00278787616492109	9.13548613933232e-05	0.00275914934646718	0.000349836983178972	6.87850961255887e-07	0.000239417863656809	0.849150849150849	0.958163458163458
k__Bacteria;p__Desulfobacterota;c__Desulfovibrionia;o__Desulfovibrionales;f__Desulfovibrionaceae;g__Bilophila;	0.00299825923040672	6.86882774863616e-05	0.00239249307707744	0.000262077190147821	8.74029130437942e-08	8.53438696508592e-05	0.124875124875125	0.265922607807575
k__Bacteria;p__Firmicutes;c__Clostridia;o__Lachnospirales;f__Lachnospiraceae;g__Lachnospiraceae_NK4A136_group;	0.00221924079363705	5.86823057270731e-05	0.00221137788356553	2.40437789126441e-06	6.93723965280133e-11	2.40437789126441e-06	0.113886113886114	0.265922607807575
k__Bacteria;p__Proteobacteria;c__Gammaproteobacteria;o__Enterobacterales;f__Enterobacteriaceae;g__Escherichia-Shigella;	0.0028780403358435	1.18166102284142e-05	0.000992329340004877	0.00397083008742318	4.58720604733798e-05	0.00195516539098742	0.691308691308691	0.830565118334903
k__Bacteria;p__Firmicutes;c__Bacilli;o__Staphylococcales;f__Staphylococcaceae;g__Staphylococcus;	0.00358132086903835	4.13530038187519e-05	0.00185636301718243	0.000715302422651163	5.06498903568655e-07	0.000205446445488975	0.0709290709290709	0.192604143823656
k__Bacteria;p__Actinobacteriota;c__Actinobacteria;o__Bifidobacteriales;f__Bifidobacteriaceae;g__Bifidobacterium;	0.00123464804716428	1.19718309656456e-06	0.000315856388327111	0.00527520509343412	5.21633374792651e-05	0.00208493280225977	0.103896103896104	0.258964915681334
k__Bacteria;p__Firmicutes;c__Clostridia;o__Christensenellales;f__Christensenellaceae;g__Christensenellaceae_R-7_group;	0.00148470334785578	2.53463449861163e-05	0.0014533394013477	0.00029934504746242	3.40862846985769e-07	0.000168538533424301	0.895104895104895	0.997662337662338
k__Bacteria;p__Proteobacteria;c__Gammaproteobacteria;o__Enterobacterales;f__Vibrionaceae;g__Vibrio;	0.00221924079363705	6.41855485712438e-06	0.00073135461400543	0.00261596314569568	1.37022213384421e-05	0.00106857464793224	0.765234765234765	0.883703327389334
k__Bacteria;p__Proteobacteria;c__Gammaproteobacteria;o__Enterobacterales;f__Pseudoalteromonadaceae;g__Pseudoalteromonas;	0.00152557777200727	3.54757034358567e-06	0.000543719469915758	0.0024933398732412	1.40280382586082e-05	0.00108120450804524	0.486513486513487	0.623133953795383
k__Bacteria;p__Firmicutes;c__Clostridia;o__Oscillospirales;f__Ruminococcaceae;g__UBA1819;	0.00114568606518749	1.21973117507515e-05	0.0010081878028899	0.000177923963953567	2.40179849942987e-07	0.000141474335111528	0.519480519480519	0.637891520244461
k__Bacteria;p__Firmicutes;c__Bacilli;o__Lactobacillales;f__Enterococcaceae;g__Enterococcus;	0.00126590495975071	1.01726215988479e-05	0.000920716279084204	0.000875193552420247	1.37914846930292e-06	0.000339011856884942	0.9000999000999	0.997684434770527
k__Bacteria;p__Proteobacteria;c__Gammaproteobacteria;o__Pseudomonadales;f__Moraxellaceae;g__Psychrobacter;	0.000109399194052531	5.2311516918249e-08	6.60249428361793e-05	0.00108918318474278	9.27235866600478e-06	0.000879031600968019	0.157842157842158	0.333666333666334
k__Bacteria;p__Firmicutes;c__Bacilli;o__Staphylococcales;f__Gemellaceae;g__Gemella;	0.00194033295825038	8.91311055729371e-06	0.000861834794556247	0.000620329495946219	1.11815690040152e-07	9.65296543556057e-05	0.102897102897103	0.258964915681334
k__Bacteria;p__Firmicutes;c__Clostridia;o__Oscillospirales;f__Oscillospiraceae;g__UCG-005;	0.000867980418746453	7.83522748636745e-06	0.000808044320482456	0.000502514979274263	1.34594431769201e-06	0.000334905996474136	0.881118881118881	0.987562772797672
k__Bacteria;p__Bacteroidota;c__Bacteroidia;o__Flavobacteriales;f__Flavobacteriaceae;g__Ulvibacter;	9.61751156505766e-06	1.10995834444821e-09	9.61751156505766e-06	0.000829510372486223	7.67231587299367e-06	0.000799599684894138	0.231768231768232	0.403380915100213
k__Bacteria;p__Actinobacteriota;c__Actinobacteria;o__Corynebacteriales;f__Corynebacteriaceae;g__Lawsonella;	0.000793444704117257	7.45536316272456e-06	0.000788213336324868	0	0	0	0.000999000999000999	0.00490685784803432
k__Bacteria;p__Bacteroidota;c__Bacteroidia;o__Bacteroidales;f__Marinifilaceae;g__Butyricimonas;	0.00155563249564808	8.00463487868886e-06	0.000816733069342368	0.000158688940823451	7.2159905552139e-08	7.75456347106544e-05	0.0649350649350649	0.180735930735931
k__Bacteria;p__Actinobacteriota;c__Actinobacteria;o__Actinomycetales;f__Actinomycetaceae;g__Actinomyces;	0.00149191648152957	6.56111986192558e-06	0.000739432206827508	0.000113005760889427	3.52979366697537e-08	5.42355485127557e-05	0.033966033966034	0.105043105043105
k__Bacteria;p__Firmicutes;c__Clostridia;o__Peptostreptococcales-Tissierellales;f__Family_XI;g__Anaerococcus;	0.000657597353260817	4.9661097209535e-06	0.000643305896713317	0	0	0	0.000999000999000999	0.00490685784803432
k__Bacteria;p__Firmicutes;c__Clostridia;o__Peptostreptococcales-Tissierellales;f__Family_XI;g__Peptoniphilus;	0.000605903228598632	4.2737810868308e-06	0.000596781722158585	0	0	0	0.000999000999000999	0.00490685784803432
k__Bacteria;p__Firmicutes;c__Bacilli;o__Lactobacillales;f__Aerococcaceae;g__Aerococcus;	0.000714100233705531	4.19880213934702e-06	0.000591523607541507	1.92350231301153e-05	9.20760899371814e-10	8.7595704773494e-06	0.198801198801199	0.399997592768677
k__Bacteria;p__Firmicutes;c__Clostridia;o__Peptostreptococcales-Tissierellales;f__Peptostreptococcaceae;g__Romboutsia;	0.00176601556113371	4.64356591658725e-06	0.000622064165807894	0.000271694701712879	1.67130716398989e-07	0.000118015082510312	0.018981018981019	0.0674431951027696
k__Bacteria;p__Firmicutes;c__Clostridia;o__Oscillospirales;f__Oscillospiraceae;g__NK4A214_group;	0.000573444127066563	3.94605800240559e-06	0.000573444127066563	7.21313367379324e-05	1.46817217379286e-08	3.49782333958428e-05	0.937062937062937	1
k__Bacteria;p__Bacteroidota;c__Bacteroidia;o__Bacteroidales;f__Prevotellaceae;g__Prevotella;	0.00065879954220645	3.87579795453109e-06	0.000568316076560914	9.61751156505766e-06	1.10995834444821e-09	9.61751156505766e-06	0.178821178821179	0.366418857216403
k__Bacteria;p__Firmicutes;c__Negativicutes;o__Acidaminococcales;f__Acidaminococcaceae;g__Phascolarctobacterium;	0.000553006914990815	3.22741831025427e-06	0.000518605366202975	0.000155082373986555	1.12577209756585e-07	9.68578037453982e-05	0.748251748251748	0.86776418026418
k__Bacteria;p__Bacteroidota;c__Bacteroidia;o__Bacteroidales;f__Rikenellaceae;g__Alistipes;	0.00112164228627485	3.46345315950471e-06	0.000537234675561241	0.000621531684891851	1.43825848108091e-06	0.000346200625972007	0.481518481518482	0.623133953795383
k__Bacteria;p__Proteobacteria;c__Gammaproteobacteria;o__Burkholderiales;f__Sutterellaceae;g__Parasutterella;	0.000930494243919328	3.0982406013376e-06	0.000508120769874775	6.85247699010358e-05	3.75083934863963e-09	1.76796477826898e-05	0.023976023976024	0.0834165834165834
k__Bacteria;p__Firmicutes;c__Clostridia;o__Monoglobales;f__Monoglobaceae;g__Monoglobus;	0.000478471200361618	2.71724739960575e-06	0.000475854266872201	2.76503457495408e-05	9.17449944082976e-09	2.76503457495408e-05	0.462537462537463	0.623133953795383
k__Bacteria;p__Proteobacteria;c__Gammaproteobacteria;o__Enterobacterales;f__Enterobacteriaceae;g__Klebsiella;	8.41532261942545e-06	8.49811857468163e-10	8.41532261942545e-06	0.000694865210575416	2.66150983228625e-06	0.000470948496147778	0.0889110889110889	0.239486320131481
k__Bacteria;p__Firmicutes;c__Bacilli;o__Lactobacillales;f__Streptococcaceae;g__Lactococcus;	0.000424372697808169	1.99234211873165e-06	0.000407465961638889	2.40437789126441e-06	6.93723965280133e-11	2.40437789126441e-06	0.0959040959040959	0.248309829705179
k__Bacteria;p__Firmicutes;c__Clostridia;o__Oscillospirales;f__Ruminococcaceae;g__Ruminococcus;	0.000506121546111159	1.82581052757541e-06	0.00039006522185136	4.80875578252883e-06	2.77489586112053e-10	4.80875578252883e-06	0.0939060939060939	0.246965632792404
k__Bacteria;p__Firmicutes;c__Clostridia;o__Clostridiales;f__Clostridiaceae;g__Clostridium_sensu_stricto_1;	0.00070808928897737	1.83315138844437e-06	0.000390848584113717	3.60656683689662e-06	1.5608789218803e-10	3.60656683689662e-06	0.001998001998002	0.00914154338811873
k__Bacteria;p__Proteobacteria;c__Gammaproteobacteria;o__Enterobacterales;f__Aeromonadaceae;g__Aeromonas;	0.000627542629620012	7.69220052447119e-07	0.000253183078102112	0.00090404608711542	2.02537126270587e-06	0.000410829573617604	0.582417582417582	0.707372627372628
k__Bacteria;p__Proteobacteria;c__Gammaproteobacteria;o__Enterobacterales;f__Morganellaceae;g__Morganella;	0.000638362330130702	1.62101059986171e-06	0.00036753804790136	0.000402733296786789	2.17745762893053e-07	0.000134705160410015	0.705294705294705	0.837715476013348
k__Bacteria;p__Bacteroidota;c__Bacteroidia;o__Bacteroidales;f__Prevotellaceae;g__Prevotellaceae_NK3B31_group;	0.000376285139982881	1.58382699532269e-06	0.000363298201128987	0.000181530530790463	1.48575176973121e-07	0.000111271131690839	0.896103896103896	0.997662337662338
k__Bacteria;p__Verrucomicrobiota;c__Verrucomicrobiae;o__Verrucomicrobiales;f__Akkermansiaceae;g__Akkermansia;	0.000405137674678054	1.32262100265021e-06	0.000331991591591591	7.57379035748291e-05	2.97844077911523e-08	4.9820015883137e-05	0.448551448551449	0.623133953795383
k__Bacteria;p__Cyanobacteria;c__Cyanobacteriia;o__Chloroplast;f__unidentified_Chloroplast;g__unidentified_Chloroplast;	0.000870384796637718	1.61556959667038e-06	0.000366920699501312	0.000655192975369553	1.10591424905971e-06	0.000303577866049183	0.707292707292707	0.837715476013348
k__Bacteria;p__Proteobacteria;c__Alphaproteobacteria;o__Rhodospirillales;f__unidentified_Rhodospirillales;g__unidentified_Rhodospirillales;	0.000329399771103225	1.0750135763426e-06	0.000299306639911675	0	0	0	0.000999000999000999	0.00490685784803432
k__Bacteria;p__Desulfobacterota;c__Desulfovibrionia;o__Desulfovibrionales;f__Desulfovibrionaceae;g__Desulfovibrio;	0.000330601960048857	1.03534360204621e-06	0.000293732247980794	1.20218894563221e-06	1.73430991320033e-11	1.20218894563221e-06	0.036963036963037	0.113262883905086
k__Bacteria;p__Firmicutes;c__Bacilli;o__Lactobacillales;f__Lactobacillaceae;g__Weissella;	0.000372678573145984	9.90253120948375e-07	0.000287264848897954	0	0	0	0.000999000999000999	0.00490685784803432
k__Bacteria;p__Patescibacteria;c__Saccharimonadia;o__Saccharimonadales;f__Saccharimonadaceae;g__TM7a;	2.40437789126441e-06	6.93723965280133e-11	2.40437789126441e-06	0.000281312213277936	8.31579530344301e-07	0.000263245691693821	0.108891108891109	0.265922607807575
k__Bacteria;p__Bacteroidota;c__Bacteroidia;o__Bacteroidales;f__Prevotellaceae;g__Prevotella_9;	0.000470055877742193	8.3827554325463e-07	0.000264303415171312	7.69400925204613e-05	1.73430991320033e-08	3.80165524607411e-05	0.122877122877123	0.265922607807575
k__Bacteria;p__Firmicutes;c__Bacilli;o__Bacillales;f__Bacillaceae;g__Bacillus;	0.000301749425353684	7.25816581901218e-07	0.000245936404703401	0.000140656106638968	1.0516066990959e-07	9.36129753780559e-05	0.696303696303696	0.830590837733695
k__Bacteria;p__Firmicutes;c__Clostridia;o__Oscillospirales;f__Oscillospiraceae;g__Oscillibacter;	0.000468853688796561	8.84971049344861e-07	0.00027156507037063	0	0	0	0.000999000999000999	0.00490685784803432
k__Bacteria;p__Proteobacteria;c__Alphaproteobacteria;o__Sphingomonadales;f__Sphingomonadaceae;g__Sphingomonas;	0.000198361176029314	2.0850031441032e-07	0.00013181436265013	0.000423170508862537	8.25745942454445e-07	0.000262320723297272	0.505494505494505	0.62764001797459
k__Bacteria;p__Actinobacteriota;c__Actinobacteria;o__Corynebacteriales;f__Nocardiaceae;g__Rhodococcus;	0.000236831222289545	6.73068334213917e-07	0.000236831222289545	0	0	0	0.000999000999000999	0.00490685784803432
k__Bacteria;p__Firmicutes;c__Bacilli;o__Erysipelotrichales;f__Erysipelotrichaceae;g__Turicibacter;	0.000488088711926676	6.91094120793571e-07	0.000239981617489335	3.12569125864374e-05	5.63177728177417e-09	2.16636740531513e-05	0.023976023976024	0.0834165834165834
k__Bacteria;p__Bacteroidota;c__Bacteroidia;o__Bacteroidales;f__Marinifilaceae;g__Odoribacter;	0.00071890898948806	1.16722841107284e-06	0.000311879839451142	4.20766130971272e-05	9.89344973212008e-09	2.87133095330953e-05	0.032967032967033	0.102906439355037
k__Bacteria;p__Proteobacteria;c__Gammaproteobacteria;o__Burkholderiales;f__Alcaligenaceae;g__Paenalcaligenes;	9.61751156505766e-05	8.39027603098809e-08	8.36175621056371e-05	0.000346230416342076	5.23736367460491e-07	0.000208913133355407	0.336663336663337	0.508803413780789
k__Bacteria;p__Proteobacteria;c__Gammaproteobacteria;o__Enterobacterales;f__Morganellaceae;g__Proteus;	0.000407542052569318	5.13108200983324e-07	0.000206782534921618	9.01641709224155e-05	2.87249020987244e-08	4.8925881101523e-05	0.160839160839161	0.337863394467168
k__Bacteria;p__Firmicutes;c__Clostridia;o__Oscillospirales;f__Ruminococcaceae;g__Negativibacillus;	0.000180328341844831	3.90219730470075e-07	0.000180328341844831	1.68306452388509e-05	1.73430991320033e-09	1.20218894563221e-05	0.881118881118881	0.987562772797672
k__Bacteria;p__Proteobacteria;c__Gammaproteobacteria;o__Steroidobacterales;f__Woeseiaceae;g__Woeseia;	0.000179126152899199	3.85034143829606e-07	0.000179126152899199	0	0	0	0.000999000999000999	0.00490685784803432
k__Bacteria;p__Proteobacteria;c__Gammaproteobacteria;o__Xanthomonadales;f__Xanthomonadaceae;g__unidentified_Xanthomonadaceae;	1.20218894563221e-06	1.73430991320033e-11	1.20218894563221e-06	0.000191148042355521	3.82070050523409e-07	0.000178435340885573	0.230769230769231	0.403380915100213
k__Bacteria;p__Firmicutes;c__Bacilli;o__Staphylococcales;f__Staphylococcaceae;g__Jeotgalicoccus;	0.000265683756984718	3.51508356562068e-07	0.000171150118454061	0.000149071429258394	2.5402910292258e-08	4.60098814497657e-05	0.775224775224775	0.883703327389334
k__Bacteria;p__Proteobacteria;c__Alphaproteobacteria;o__Rhizobiales;f__Beijerinckiaceae;g__1174-901-12;	0	0	0	0.000270492512767247	4.39056320980421e-07	0.000191279969542993	0.000999000999000999	0.00490685784803432
k__Bacteria;p__Firmicutes;c__Clostridia;o__Lachnospirales;f__Lachnospiraceae;g__Lachnoclostridium;	0.000347432605287708	4.32976776411966e-07	0.000189951041150952	5.53006914990815e-05	1.61133157390067e-08	3.66439123400312e-05	0.178821178821179	0.366418857216403
k__Bacteria;p__Verrucomicrobiota;c__Verrucomicrobiae;o__Chthoniobacterales;f__Chthoniobacteraceae;g__Chthoniobacter;	0.00016349769660598	3.15669630528471e-07	0.000162190636425286	0	0	0	0.000999000999000999	0.00490685784803432
k__Bacteria;p__Firmicutes;c__Bacilli;o__Lactobacillales;f__Lactobacillaceae;g__Lactiplantibacillus;	0.000158688940823451	2.97229186215024e-07	0.000157382015653797	0	0	0	0.000999000999000999	0.00490685784803432
k__Bacteria;p__Firmicutes;c__Bacilli;o__Lactobacillales;f__Lactobacillaceae;g__Lactobacillus;	0.000334208526885754	3.54776742425763e-07	0.000171943969174497	0.000329399771103225	4.12103568283912e-07	0.000185315849359032	0.969030969030969	1
k__Bacteria;p__Firmicutes;c__Clostridia;o__Oscillospirales;f__Oscillospiraceae;g__Colidextribacter;	0.000153880185040923	2.65380949627164e-07	0.000148711395446338	2.40437789126441e-06	3.15329075127333e-11	1.62103124360013e-06	0.318681318681319	0.490504886818251
k__Bacteria;p__Elusimicrobiota;c__Elusimicrobia;o__Elusimicrobiales;f__Elusimicrobiaceae;g__Elusimicrobium;	0.000149071429258394	2.62013235104804e-07	0.000147764800472689	0	0	0	0.000999000999000999	0.00490685784803432
k__Bacteria;p__Proteobacteria;c__Alphaproteobacteria;o__Rhodobacterales;f__Rhodobacteraceae;g__Paracoccus;	0.000156284562932187	2.47085556688276e-07	0.000143493773583931	0	0	0	0.000999000999000999	0.00490685784803432
k__Bacteria;p__Campylobacterota;c__Campylobacteria;o__Campylobacterales;f__Helicobacteraceae;g__Helicobacter;	0.0001418582955846	2.41485312314014e-07	0.0001418582955846	0	0	0	0.000999000999000999	0.00490685784803432
k__Bacteria;p__Bacteroidota;c__Bacteroidia;o__Bacteroidales;f__Muribaculaceae;g__Muribaculum;	0.000140656106638968	2.37409684017994e-07	0.000140656106638968	0	0	0	0.000999000999000999	0.00490685784803432
k__Bacteria;p__Campylobacterota;c__Campylobacteria;o__Campylobacterales;f__Campylobacteraceae;g__Campylobacter;	0.000138251728747704	2.29362486020744e-07	0.000138251728747704	0	0	0	0.000999000999000999	0.00490685784803432
k__Bacteria;p__Proteobacteria;c__Gammaproteobacteria;o__Ectothiorhodospirales;f__Thioalkalispiraceae;g__Thioalkalispira-Sulfurivermis;	0.000137049539802072	2.25390916319515e-07	0.000137049539802072	0	0	0	0.000999000999000999	0.00490685784803432
k__Bacteria;p__Firmicutes;c__Clostridia;o__Christensenellales;f__Christensenellaceae;g__Christensenella;	0.000194754609192418	2.15401291219481e-07	0.000133978011634833	5.28963136078171e-05	2.8921982770679e-08	4.9093433684047e-05	0.427572427572428	0.623133953795383
k__Bacteria;p__Firmicutes;c__Clostridia;o__Peptostreptococcales-Tissierellales;f__Family_XI;g__Finegoldia;	0.000138251728747704	2.1256175289796e-07	0.000133091996033433	0	0	0	0.000999000999000999	0.00490685784803432
k__Bacteria;p__Proteobacteria;c__Alphaproteobacteria;o__Caulobacterales;f__Caulobacteraceae;g__Brevundimonas;	8.41532261942545e-06	3.20059011254243e-10	5.16445391800401e-06	0.000323388826375064	2.72234627075056e-07	0.000150619450679258	0.015984015984016	0.058028927594145
k__Bacteria;p__Firmicutes;c__Bacilli;o__Erysipelotrichales;f__Erysipelatoclostridiaceae;g__Erysipelatoclostridium;	0.000129836406128278	2.02289908275687e-07	0.000129836406128278	0	0	0	0.000999000999000999	0.00490685784803432
k__Bacteria;p__Firmicutes;c__Clostridia;o__Lachnospirales;f__Lachnospiraceae;g__Coprococcus;	0.000127432028237014	1.94867061847189e-07	0.000127432028237014	0	0	0	0.000999000999000999	0.00490685784803432
k__Bacteria;p__Proteobacteria;c__Alphaproteobacteria;o__Rhizobiales;f__Beijerinckiaceae;g__Methylobacterium-Methylorubrum;	4.80875578252883e-05	2.11270480335313e-08	4.19593533807137e-05	0.000270492512767247	2.27003824538792e-07	0.000137539032198982	0.113886113886114	0.265922607807575
k__Bacteria;p__Proteobacteria;c__Gammaproteobacteria;o__Enterobacterales;f__Shewanellaceae;g__Shewanella;	0.000220000577050694	1.2071269989487e-07	0.000100296518672912	0.000336612904777018	2.56148114307435e-07	0.000146101595447436	0.512487512487512	0.631626675907119
k__Bacteria;p__Bacteroidota;c__Bacteroidia;o__Flavobacteriales;f__Weeksellaceae;g__Bergeyella;	0.000108197005106899	1.40479102969227e-07	0.000108197005106899	0	0	0	0.000999000999000999	0.00490685784803432
k__Bacteria;p__Proteobacteria;c__Alphaproteobacteria;o__Rickettsiales;f__Mitochondria;g__unidentified_Mitochondria;	0.0001418582955846	1.35383385115169e-07	0.000106216518299168	2.40437789126441e-05	1.82890863573853e-09	1.2345406148775e-05	0.268731268731269	0.429455711752363
k__Bacteria;p__Actinobacteriota;c__Actinobacteria;o__Streptosporangiales;f__Streptosporangiaceae;g__Nonomuraea;	0.000100983871433105	1.22372907475416e-07	0.000100983871433105	0	0	0	0.000999000999000999	0.00490685784803432
k__Bacteria;p__Bacteroidota;c__Bacteroidia;o__Flavobacteriales;f__Flavobacteriaceae;g__Flavobacterium;	1.80328341844831e-05	2.53997570015067e-09	1.45486989686096e-05	0.000123825461400117	1.12514143941559e-07	9.68306700472357e-05	0.248751248751249	0.403380915100213
k__Archaea;p__Euryarchaeota;c__Methanobacteria;o__Methanobacteriales;f__Methanobacteriaceae;g__Methanobrevibacter;	0.000109399194052531	1.10319453578673e-07	9.58816343113882e-05	0	0	0	0.000999000999000999	0.00490685784803432
k__Bacteria;p__Proteobacteria;c__Gammaproteobacteria;o__Enterobacterales;f__Enterobacteriaceae;g__Enterobacter;	0.000104590438270002	1.02133510788368e-07	9.22557635003398e-05	3.12569125864374e-05	3.66412385297961e-09	1.74740852239815e-05	0.731268731268731	0.853999147705441
k__Bacteria;p__Firmicutes;c__Bacilli;o__Erysipelotrichales;f__Erysipelotrichaceae;g__Allobaculum;	0.000229618088615752	1.56067395798147e-07	0.000114042169027567	5.77050693903459e-05	1.00274645890492e-08	2.89071279979079e-05	0.201798201798202	0.403380915100213
k__Bacteria;p__Firmicutes;c__Clostridia;o__Oscillospirales;f__Oscillospiraceae;g__UCG-002;	8.89619819767833e-05	9.49708108468502e-08	8.89619819767833e-05	0	0	0	0.000999000999000999	0.00490685784803432
k__Bacteria;p__Firmicutes;c__Clostridia;o__Lachnospirales;f__Lachnospiraceae;g__Roseburia;	9.256854881368e-05	8.9205018708147e-08	8.62192064392398e-05	0	0	0	0.000999000999000999	0.00490685784803432
k__Bacteria;p__Firmicutes;c__Clostridia;o__Oscillospirales;f__Ruminococcaceae;g__Faecalibacterium;	0.000132240784019543	9.40248236214683e-08	8.85178059401366e-05	7.21313367379324e-06	6.2435156875212e-10	7.21313367379324e-06	0.101898101898102	0.258964915681334
k__Bacteria;p__Actinobacteriota;c__Actinobacteria;o__Micrococcales;f__Micrococcaceae;g__Kocuria;	8.65576040855189e-05	8.99066259003053e-08	8.65576040855189e-05	0	0	0	0.000999000999000999	0.00490685784803432
k__Bacteria;p__Bacteroidota;c__Bacteroidia;o__Bacteroidales;f__Prevotellaceae;g__Alloprevotella;	8.89619819767833e-05	8.95219244286499e-08	8.63722198918967e-05	3.60656683689662e-06	1.5608789218803e-10	3.60656683689662e-06	0.462537462537463	0.623133953795383
k__Bacteria;p__Actinobacteriota;c__Thermoleophilia;o__Gaiellales;f__Gaiellaceae;g__Gaiella;	8.17488483029901e-05	7.51996778363665e-08	7.91621110108694e-05	0	0	0	0.000999000999000999	0.00490685784803432
k__Bacteria;p__Proteobacteria;c__Gammaproteobacteria;o__Burkholderiales;f__Neisseriaceae;g__Uruburuella;	0.000105792627215634	7.03940627314259e-08	7.65909387217933e-05	5.04919357165527e-05	1.76899611146434e-08	3.83948359316755e-05	0.569430569430569	0.694123394853322
k__Bacteria;p__Firmicutes;c__Clostridia;o__Lachnospirales;f__Lachnospiraceae;g__Sellimonas;	7.57379035748291e-05	6.88347604549212e-08	7.5737903574829e-05	0	0	0	0.000999000999000999	0.00490685784803432
k__Bacteria;p__Proteobacteria;c__Gammaproteobacteria;o__Enterobacterales;f__Idiomarinaceae;g__Aliidiomarina;	5.16941246621849e-05	1.8672211183665e-08	3.94463889176025e-05	0.000157486751877819	8.25074291524424e-08	8.29193529644128e-05	0.313686313686314	0.485051985051985
k__Bacteria;p__Firmicutes;c__Clostridia;o__Lachnospirales;f__Lachnospiraceae;g__Hungatella;	0.00011420794983506	8.02370598115256e-08	8.17705426847619e-05	2.40437789126441e-05	6.93723965280133e-09	2.40437789126441e-05	0.228771228771229	0.403380915100213
k__Bacteria;p__Firmicutes;c__Clostridia;o__Oscillospirales;f__Butyricicoccaceae;g__UCG-009;	7.33335256835646e-05	6.45336718701844e-08	7.33335256835646e-05	1.20218894563221e-06	1.73430991320033e-11	1.20218894563221e-06	0.462537462537463	0.623133953795383
k__Bacteria;p__Firmicutes;c__Bacilli;o__Bacillales;f__Bacillaceae;g__Geobacillus;	7.33335256835646e-05	6.45336718701844e-08	7.33335256835646e-05	0	0	0	0.000999000999000999	0.00490685784803432
k__Bacteria;p__Bdellovibrionota;c__Bdellovibrionia;o__Bdellovibrionales;f__Bdellovibrionaceae;g__OM27_clade;	7.33335256835646e-05	6.45336718701844e-08	7.33335256835646e-05	0	0	0	0.000999000999000999	0.00490685784803432
k__Bacteria;p__Firmicutes;c__Clostridia;o__Lachnospirales;f__Lachnospiraceae;g__[Ruminococcus]_torques_group;	6.9726958846668e-05	5.83421854800592e-08	6.9726958846668e-05	0	0	0	0.000999000999000999	0.00490685784803432
k__Bacteria;p__Actinobacteriota;c__Actinobacteria;o__Micrococcales;f__Microbacteriaceae;g__Microbacterium;	0.000139453917693336	7.10751735337009e-08	7.69605816493639e-05	8.05466593573579e-05	1.54558546173662e-08	3.58885481007594e-05	0.544455544455544	0.666110446330227
k__Bacteria;p__Cyanobacteria;c__Cyanobacteriia;o__Synechococcales;f__Cyanobiaceae;g__Cyanobium_PCC-6307;	6.85247699010358e-05	5.63477290798788e-08	6.85247699010358e-05	0	0	0	0.000999000999000999	0.00490685784803432
k__Bacteria;p__Firmicutes;c__Clostridia;o__Oscillospirales;f__Ruminococcaceae;g__Subdoligranulum;	0.00012502765034575	6.93345570389981e-08	7.6012365791691e-05	0	0	0	0.000999000999000999	0.00490685784803432
k__Bacteria;p__Firmicutes;c__Bacilli;o__Lactobacillales;f__Lactobacillaceae;g__Latilactobacillus;	7.33335256835646e-05	5.2046640495142e-08	6.58575739096259e-05	0	0	0	0.000999000999000999	0.00490685784803432
k__Bacteria;p__Firmicutes;c__Clostridia;o__Lachnospirales;f__Lachnospiraceae;g__[Eubacterium]_hallii_group;	6.61203920097714e-05	5.24628748743101e-08	6.61203920097714e-05	0	0	0	0.000999000999000999	0.00490685784803432
k__Bacteria;p__Firmicutes;c__Clostridia;o__Oscillospirales;f__Ruminococcaceae;g__Pygmaiobacter;	6.49182030641392e-05	5.05724770689217e-08	6.49182030641392e-05	0	0	0	0.000999000999000999	0.00490685784803432
k__Bacteria;p__Myxococcota;c__Polyangia;o__Polyangiales;f__Sandaracinaceae;g__Sandaracinus;	6.3716014118507e-05	4.87167654617974e-08	6.3716014118507e-05	0	0	0	0.000999000999000999	0.00490685784803432
k__Bacteria;p__Firmicutes;c__Bacilli;o__Bacillales;f__Planococcaceae;g__Sporosarcina;	1.56284562932187e-05	7.36293390422323e-10	7.83312086815936e-06	9.37707377593122e-05	4.66750097003479e-08	6.23665306209641e-05	0.116883116883117	0.265922607807575
k__Bacteria;p__Firmicutes;c__Clostridia;o__Lachnospirales;f__Lachnospiraceae;g__Marvinbryantia;	6.9726958846668e-05	4.831472089101e-08	6.34525550385286e-05	1.20218894563221e-06	1.73430991320033e-11	1.20218894563221e-06	0.23976023976024	0.403380915100213
k__Bacteria;p__Nitrospirota;c__Nitrospiria;o__Nitrospirales;f__Nitrospiraceae;g__Nitrospira;	6.13116362272426e-05	4.51094008423407e-08	6.13116362272426e-05	6.01094472816104e-06	2.82219522238963e-10	4.84956632286987e-06	0.695304695304695	0.830590837733695
k__Bacteria;p__Firmicutes;c__Clostridia;o__Oscillospirales;f__Ruminococcaceae;g__Paludicola;	8.41532261942545e-06	8.49811857468163e-10	8.41532261942545e-06	6.3716014118507e-05	4.48571375822388e-08	6.11399607337125e-05	0.45954045954046	0.623133953795383
k__Bacteria;p__Firmicutes;c__Clostridia;o__Lachnospirales;f__Lachnospiraceae;g__Fusicatenibacter;	6.61203920097714e-05	4.2851644664429e-08	5.97575969120447e-05	8.41532261942545e-06	8.49811857468163e-10	8.41532261942545e-06	0.507492507492508	0.627787027787028
k__Bacteria;p__Myxococcota;c__Myxococcia;o__Myxococcales;f__Myxococcaceae;g__P3OB-42;	5.89072583359781e-05	4.164078101594e-08	5.89072583359781e-05	2.40437789126441e-06	6.93723965280133e-11	2.40437789126441e-06	0.465534465534466	0.623133953795383
k__Bacteria;p__Chloroflexi;c__Anaerolineae;o__Anaerolineales;f__Anaerolineaceae;g__UTCFX1;	5.89072583359781e-05	4.164078101594e-08	5.89072583359781e-05	0	0	0	0.000999000999000999	0.00490685784803432
k__Bacteria;p__Proteobacteria;c__Alphaproteobacteria;o__Caulobacterales;f__Caulobacteraceae;g__unidentified_Caulobacteraceae;	0	0	0	9.13663598680477e-05	5.01120966192358e-08	6.46220399832981e-05	0.000999000999000999	0.00490685784803432
k__Bacteria;p__Bacteroidota;c__Bacteroidia;o__Flavobacteriales;f__Flavobacteriaceae;g__Myroides;	8.29510372486223e-05	4.19308837650571e-08	5.91120995546154e-05	3.84700462602306e-05	8.67785614750421e-09	2.68915354518608e-05	0.457542457542458	0.623133953795383
k__Bacteria;p__Cyanobacteria;c__Cyanobacteriia;o__Synechococcales;f__Cyanobiaceae;g__Synechococcus_CC9902;	5.53006914990815e-05	3.66979977633191e-08	5.53006914990815e-05	0	0	0	0.000999000999000999	0.00490685784803432
k__Bacteria;p__Proteobacteria;c__Gammaproteobacteria;o__Enterobacterales;f__Pasteurellaceae;g__Testudinibacter;	1.20218894563221e-05	1.73430991320033e-09	1.20218894563221e-05	5.40985025534493e-05	3.51197757423068e-08	5.40985025534493e-05	0.447552447552448	0.623133953795383
k__Bacteria;p__Firmicutes;c__Bacilli;o__Lactobacillales;f__Aerococcaceae;g__Globicatella;	0.000105792627215634	6.1085548433667e-08	7.13474762656133e-05	8.89619819767833e-05	2.25838683606196e-08	4.33818974925214e-05	0.902097902097902	0.997684434770527
k__Bacteria;p__Firmicutes;c__Clostridia;o__Lachnospirales;f__Lachnospiraceae;g__Blautia;	0.000102186060378738	1.18232636718994e-08	3.13890422386265e-05	8.05466593573579e-05	3.06294897124935e-08	5.05218514708351e-05	0.73026973026973	0.853999147705441
k__Bacteria;p__Desulfobacterota;c__Desulfuromonadia;o__Desulfuromonadales;f__Desulfuromonadaceae;g__Desulfuromonas;	5.16941246621849e-05	3.20673902950742e-08	5.16941246621849e-05	0	0	0	0.000999000999000999	0.00490685784803432
k__Bacteria;p__Desulfobacterota;c__Desulfobacteria;o__Desulfobacterales;f__Desulfosarcinaceae;g__Sva0081_sediment_group;	5.16941246621849e-05	3.20673902950742e-08	5.16941246621849e-05	0	0	0	0.000999000999000999	0.00490685784803432
k__Bacteria;p__Proteobacteria;c__Alphaproteobacteria;o__Rhizobiales;f__Rhizobiaceae;g__Allorhizobium-Neorhizobium-Pararhizobium-Rhizobium;	2.52459678582764e-05	4.39411066189939e-09	1.91357228369251e-05	0.000157486751877819	5.66630581550062e-08	6.87162390772165e-05	0.0929070929070929	0.246277531991818
k__Bacteria;p__Proteobacteria;c__Gammaproteobacteria;o__Burkholderiales;f__Oxalobacteraceae;g__Massilia;	1.32240784019543e-05	7.74132879437603e-10	8.03187856522165e-06	8.41532261942545e-05	3.76439849887011e-08	5.60089166924198e-05	0.382617382617383	0.567974247974248
k__Bacteria;p__Firmicutes;c__Bacilli;o__Lactobacillales;f__Carnobacteriaceae;g__Granulicatella;	5.04919357165527e-05	3.05932268688539e-08	5.04919357165527e-05	0	0	0	0.000999000999000999	0.00490685784803432
k__Bacteria;p__Firmicutes;c__Bacilli;o__Lactobacillales;f__Aerococcaceae;g__Facklamia;	3.60656683689662e-05	9.85718688848044e-09	2.86606392236235e-05	0.000121421083508853	4.49706560492846e-08	6.12172742840917e-05	0.230769230769231	0.403380915100213
k__Bacteria;p__Firmicutes;c__Clostridia;o__Oscillospirales;f__Oscillospiraceae;g__unidentified_Oscillospiraceae;	4.68853688796561e-05	2.63788537797771e-08	4.68853688796561e-05	0	0	0	0.000999000999000999	0.00490685784803432
k__Bacteria;p__Actinobacteriota;c__Actinobacteria;o__Micrococcales;f__Micrococcaceae;g__Enteractinococcus;	7.33335256835646e-05	2.80564044594545e-08	4.83532181447579e-05	5.77050693903459e-05	1.59304248754329e-08	3.64353592858102e-05	0.772227772227772	0.883703327389334
k__Bacteria;p__Firmicutes;c__Bacilli;o__Lactobacillales;f__Carnobacteriaceae;g__Atopostipes;	6.01094472816104e-05	2.39460899651697e-08	4.46711036028603e-05	7.45357146291968e-05	1.50538100465789e-08	3.54186980357585e-05	0.721278721278721	0.851261812392554
k__Bacteria;p__Firmicutes;c__Clostridia;o__Oscillospirales;f__Butyricicoccaceae;g__Butyricicoccus;	5.04919357165527e-05	2.35929214010271e-08	4.43404644023822e-05	0	0	0	0.000999000999000999	0.00490685784803432
k__Bacteria;p__Firmicutes;c__Clostridia;o__Oscillospirales;f__[Eubacterium]_coprostanoligenes_group;g__unidentified_[Eubacterium]_coprostanoligenes_group;	4.20766130971273e-05	2.12452964367041e-08	4.20766130971273e-05	4.0874424151495e-05	6.01017217192697e-09	2.23796264712777e-05	0.97002997002997	1
k__Bacteria;p__Firmicutes;c__Clostridia;o__Oscillospirales;f__Ruminococcaceae;g__[Eubacterium]_siraeum_group;	4.0874424151495e-05	2.00486225965958e-08	4.0874424151495e-05	2.40437789126441e-06	6.93723965280133e-11	2.40437789126441e-06	0.462537462537463	0.623133953795383
k__Bacteria;p__Bacteroidota;c__Bacteroidia;o__Flavobacteriales;f__Flavobacteriaceae;g__Capnocytophaga;	3.96722352058628e-05	1.88866349547516e-08	3.96722352058628e-05	0	0	0	0.000999000999000999	0.00490685784803432
k__Bacteria;p__Firmicutes;c__Bacilli;o__Acholeplasmatales;f__Acholeplasmataceae;g__Anaeroplasma;	3.84700462602306e-05	1.77593335111714e-08	3.84700462602306e-05	0	0	0	0.000999000999000999	0.00490685784803432
k__Bacteria;p__Actinobacteriota;c__Actinobacteria;o__Corynebacteriales;f__Dietziaceae;g__Dietzia;	8.41532261942545e-06	4.71416967315363e-10	6.2677545641386e-06	4.92897467709205e-05	1.57585705294885e-08	3.62382975702599e-05	0.27972027972028	0.44069138408761
k__Bacteria;p__Firmicutes;c__Clostridia;o__Lachnospirales;f__Lachnospiraceae;g__GCA-900066575;	3.36612904777018e-05	1.35969897194906e-08	3.36612904777018e-05	0	0	0	0.000999000999000999	0.00490685784803432
k__Bacteria;p__Actinobacteriota;c__Coriobacteriia;o__Coriobacteriales;f__Atopobiaceae;g__Coriobacteriaceae_UCG-002;	3.4863479423334e-05	2.89314426429328e-09	1.55272455818079e-05	0.00011420794983506	2.24183205961778e-08	4.32226026867288e-05	0.103896103896104	0.258964915681334
k__Bacteria;p__Firmicutes;c__Clostridia;o__Lachnospirales;f__Lachnospiraceae;g__[Eubacterium]_xylanophilum_group;	3.12569125864374e-05	1.17239350132343e-08	3.12569125864374e-05	1.92350231301153e-05	4.43983337779285e-09	1.92350231301153e-05	0.45954045954046	0.623133953795383
k__Bacteria;p__Actinobacteriota;c__Actinobacteria;o__Micrococcales;f__Microbacteriaceae;g__Agrococcus;	0	0	0	4.32788020427595e-05	1.26383893311035e-08	3.24530293027522e-05	0.000999000999000999	0.00490685784803432
k__Bacteria;p__Bacteroidota;c__Bacteroidia;o__Flavobacteriales;f__Weeksellaceae;g__Chryseobacterium;	5.16941246621849e-05	1.47369043260759e-08	3.50439061821927e-05	7.21313367379324e-06	3.2163565662988e-10	5.17715862088688e-06	0.363636363636364	0.547092547092547
k__Bacteria;p__Firmicutes;c__Clostridia;o__Christensenellales;f__Christensenellaceae;g__unidentified_Christensenellaceae;	2.16394010213797e-05	5.61916411876908e-09	2.16394010213797e-05	3.36612904777018e-05	1.06833490653141e-08	2.98375449522271e-05	0.481518481518482	0.623133953795383
k__Bacteria;p__Proteobacteria;c__Gammaproteobacteria;o__Xanthomonadales;f__Xanthomonadaceae;g__Pseudoxanthomonas;	0	0	0	3.84700462602306e-05	1.04941516202377e-08	2.95721597963322e-05	0.000999000999000999	0.00490685784803432
k__Bacteria;p__Proteobacteria;c__Gammaproteobacteria;o__Enterobacterales;f__Idiomarinaceae;g__Idiomarina;	3.12569125864374e-05	9.90763954050082e-09	2.87338933730719e-05	9.61751156505766e-06	1.10995834444821e-09	9.61751156505766e-06	0.473526473526474	0.623133953795383
k__Bacteria;p__Proteobacteria;c__Gammaproteobacteria;o__Pseudomonadales;f__Marinomonadaceae;g__Marinomonas;	7.33335256835646e-05	1.26178929412202e-08	3.24267031693791e-05	3.96722352058628e-05	3.22108650242571e-09	1.63836465782848e-05	0.371628371628372	0.556609309972539
k__Bacteria;p__Actinobacteriota;c__Actinobacteria;o__Corynebacteriales;f__unidentified_Corynebacteriales;g__Tomitella;	2.40437789126441e-06	6.93723965280133e-11	2.40437789126441e-06	2.76503457495408e-05	7.585240902188e-09	2.51416667807778e-05	0.226773226773227	0.403380915100213
k__Bacteria;p__Actinobacteriota;c__Actinobacteria;o__Micrococcales;f__Micrococcaceae;g__Yaniella;	6.01094472816104e-06	2.06540544208403e-10	4.14870003945416e-06	4.92897467709205e-05	1.18989426499299e-08	3.14893403259075e-05	0.275724275724276	0.436454540719944
k__Bacteria;p__Bacteroidota;c__Bacteroidia;o__Sphingobacteriales;f__Sphingobacteriaceae;g__Sphingobacterium;	0	0	0	6.25138251728748e-05	1.00779172410696e-08	2.89797590872629e-05	0.000999000999000999	0.00490685784803432
k__Bacteria;p__Firmicutes;c__Clostridia;o__Oscillospirales;f__Oscillospiraceae;g__Papillibacter;	2.40437789126441e-05	6.93723965280133e-09	2.40437789126441e-05	2.40437789126441e-06	6.93723965280133e-11	2.40437789126441e-06	0.462537462537463	0.623133953795383
k__Bacteria;p__Proteobacteria;c__Gammaproteobacteria;o__Xanthomonadales;f__Rhodanobacteraceae;g__Ahniella;	2.40437789126441e-05	6.93723965280133e-09	2.40437789126441e-05	0	0	0	0.000999000999000999	0.00490685784803432
k__Bacteria;p__Firmicutes;c__Bacilli;o__Erysipelotrichales;f__Erysipelotrichaceae;g__Faecalibaculum;	5.04919357165527e-05	8.7976811960526e-09	2.70765599674525e-05	1.68306452388509e-05	3.39924742987265e-09	1.68306452388509e-05	0.335664335664336	0.508803413780789
k__Bacteria;p__Actinobacteriota;c__Actinobacteria;o__Micrococcales;f__Dermabacteraceae;g__Brachybacterium;	1.92350231301153e-05	3.87224104256365e-09	1.79634838922457e-05	3.96722352058628e-05	6.89151693690787e-09	2.39644127421403e-05	0.472527472527473	0.623133953795383
k__Bacteria;p__Proteobacteria;c__Gammaproteobacteria;o__Burkholderiales;f__Alcaligenaceae;g__Oligella;	3.12569125864374e-05	6.27504859503393e-09	2.28674597682565e-05	1.08197005106899e-05	1.10207511757003e-09	9.58329761255675e-06	0.44955044955045	0.623133953795383
k__Bacteria;p__Firmicutes;c__Bacilli;o__Lactobacillales;f__Lactobacillaceae;g__Pediococcus;	2.40437789126441e-05	5.57501804825125e-09	2.15542301498864e-05	0	0	0	0.000999000999000999	0.00490685784803432
k__Bacteria;p__Firmicutes;c__Bacilli;o__Bacillales;f__Bacillaceae;g__Pseudogracilibacillus;	2.16394010213797e-05	5.61916411876908e-09	2.16394010213797e-05	3.12569125864374e-05	2.68029713858233e-09	1.49451696170322e-05	0.669330669330669	0.80998711433494
k__Bacteria;p__Acidobacteriota;c__Acidobacteriae;o__Acidobacteriales;f__Acidobacteriaceae_(Subgroup_1);g__Terriglobus;	0	0	0	2.16394010213797e-05	5.61916411876908e-09	2.16394010213797e-05	0.000999000999000999	0.00490685784803432
k__Bacteria;p__Proteobacteria;c__Alphaproteobacteria;o__Rhodobacterales;f__Rhodobacteraceae;g__Rubellimicrobium;	2.04372120757475e-05	5.01215564914896e-09	2.04372120757475e-05	0	0	0	0.000999000999000999	0.00490685784803432
k__Bacteria;p__Actinobacteriota;c__Actinobacteria;o__Micrococcales;f__Brevibacteriaceae;g__Brevibacterium;	1.56284562932187e-05	8.87651346483444e-10	8.6006363450786e-06	4.56831799340239e-05	7.59943071056873e-09	2.5165172213744e-05	0.284715284715285	0.445927903871829
k__Bacteria;p__Proteobacteria;c__Gammaproteobacteria;o__Burkholderiales;f__Rhodocyclaceae;g__Methyloversatilis;	2.04372120757475e-05	4.40672382490448e-09	1.91631674158712e-05	1.20218894563221e-06	1.73430991320033e-11	1.20218894563221e-06	0.203796203796204	0.403380915100213
k__Bacteria;p__Bacteroidota;c__Bacteroidia;o__Bacteroidales;f__Prevotellaceae;g__Prevotella_7;	2.8852534695173e-05	4.88129408297112e-09	2.01686515888956e-05	0	0	0	0.000999000999000999	0.00490685784803432
k__Bacteria;p__Firmicutes;c__Clostridia;o__Lachnospirales;f__Lachnospiraceae;g__[Eubacterium]_ventriosum_group;	2.04372120757475e-05	3.87697097869056e-09	1.79744517271287e-05	0	0	0	0.000999000999000999	0.00490685784803432
k__Bacteria;p__Firmicutes;c__Clostridia;o__Oscillospirales;f__Oscillospiraceae;g__Intestinimonas;	2.76503457495408e-05	4.10400791278224e-09	1.84932598369925e-05	0	0	0	0.000999000999000999	0.00490685784803432
k__Bacteria;p__Proteobacteria;c__Gammaproteobacteria;o__Enterobacterales;f__Aeromonadaceae;g__Oceanisphaera;	9.61751156505766e-06	6.55884476264853e-10	7.39303994908304e-06	2.76503457495408e-05	3.38505762149192e-09	1.67954796038793e-05	0.325674325674326	0.498214114652471
k__Bacteria;p__Proteobacteria;c__Gammaproteobacteria;o__Enterobacterales;f__Alteromonadaceae;g__Rheinheimera;	1.92350231301153e-05	3.38032768536501e-09	1.67837413522855e-05	0	0	0	0.000999000999000999	0.00490685784803432
k__Bacteria;p__Patescibacteria;c__Saccharimonadia;o__Saccharimonadales;f__Saccharimonadaceae;g__Candidatus_Saccharimonas;	4.44809909883917e-05	5.04999513816424e-09	2.0514212833554e-05	8.41532261942545e-06	8.49811857468163e-10	8.41532261942545e-06	0.0949050949050949	0.247642982017982
k__Bacteria;p__Firmicutes;c__Clostridia;o__Lachnospirales;f__Lachnospiraceae;g__Tuzzerella;	1.68306452388509e-05	3.39924742987265e-09	1.68306452388509e-05	0	0	0	0.000999000999000999	0.00490685784803432
k__Bacteria;p__Firmicutes;c__Clostridia;o__Lachnospirales;f__Lachnospiraceae;g__Lachnospiraceae_NK4B4_group;	1.68306452388509e-05	3.39924742987265e-09	1.68306452388509e-05	0	0	0	0.000999000999000999	0.00490685784803432
k__Bacteria;p__Actinobacteriota;c__Coriobacteriia;o__Coriobacteriales;f__Coriobacteriaceae;g__Collinsella;	2.8852534695173e-05	4.69209663789472e-09	1.97739235650868e-05	0	0	0	0.000999000999000999	0.00490685784803432
k__Bacteria;p__Proteobacteria;c__Gammaproteobacteria;o__Enterobacterales;f__Erwiniaceae;g__Pantoea;	6.01094472816104e-06	4.33577478300083e-10	6.01094472816104e-06	1.56284562932187e-05	2.93098375330856e-09	1.56284562932187e-05	0.468531468531469	0.623133953795383
k__Bacteria;p__Firmicutes;c__Clostridia;o__Peptostreptococcales-Tissierellales;f__Anaerovoracaceae;g__Family_XIII_AD3011_group;	1.44262673475865e-05	2.49740627500848e-09	1.44262673475865e-05	2.40437789126441e-06	6.93723965280133e-11	2.40437789126441e-06	0.462537462537463	0.623133953795383
k__Bacteria;p__Firmicutes;c__Bacilli;o__Lactobacillales;f__Aerococcaceae;g__Eremococcus;	1.44262673475865e-05	2.49740627500848e-09	1.44262673475865e-05	0	0	0	0.000999000999000999	0.00490685784803432
k__Bacteria;p__Proteobacteria;c__Gammaproteobacteria;o__Burkholderiales;f__Burkholderiaceae;g__Burkholderia-Caballeronia-Paraburkholderia;	3.60656683689662e-06	1.5608789218803e-10	3.60656683689662e-06	1.20218894563221e-05	1.73430991320033e-09	1.20218894563221e-05	0.0922838971210627	0.246277531991818
k__Bacteria;p__Firmicutes;c__Clostridia;o__Oscillospirales;f__Ruminococcaceae;g__Fournierella;	1.56284562932187e-05	1.79579908285016e-09	1.22331485550878e-05	0	0	0	0.000999000999000999	0.00490685784803432
k__Bacteria;p__Firmicutes;c__Clostridia;o__Oscillospirales;f__Oscillospiraceae;g__Flavonifractor;	1.20218894563221e-05	1.73430991320033e-09	1.20218894563221e-05	0	0	0	0.00195307216984392	0.00906008478788709
k__Bacteria;p__Firmicutes;c__Clostridia;o__Peptostreptococcales-Tissierellales;f__Peptostreptococcaceae;g__Peptostreptococcus;	1.20218894563221e-05	1.73430991320033e-09	1.20218894563221e-05	0	0	0	0.00195307216984392	0.00906008478788709
k__Bacteria;p__Actinobacteriota;c__Actinobacteria;o__Micrococcales;f__Microbacteriaceae;g__Amnibacterium;	0	0	0	1.68306452388509e-05	1.88566786926145e-09	1.25355091282772e-05	0.000999000999000999	0.00490685784803432
k__Bacteria;p__Fusobacteriota;c__Fusobacteriia;o__Fusobacteriales;f__Fusobacteriaceae;g__Fusobacterium;	1.20218894563221e-05	1.73430991320033e-09	1.20218894563221e-05	0	0	0	0.00195307216984392	0.00906008478788709
k__Bacteria;p__Actinobacteriota;c__Actinobacteria;o__Propionibacteriales;f__Propionibacteriaceae;g__Propioniciclava;	1.20218894563221e-05	1.73430991320033e-09	1.20218894563221e-05	0	0	0	0.00195307216984392	0.00906008478788709
k__Bacteria;p__Firmicutes;c__Bacilli;o__Erysipelotrichales;f__Erysipelotrichaceae;g__Erysipelothrix;	1.08197005106899e-05	1.40479102969227e-09	1.08197005106899e-05	0	0	0	0.00390616547157246	0.0171665693092789
k__Bacteria;p__Firmicutes;c__Negativicutes;o__Acidaminococcales;f__Acidaminococcaceae;g__Acidaminococcus;	1.08197005106899e-05	1.40479102969227e-09	1.08197005106899e-05	0	0	0	0.00390616547157246	0.0171665693092789
k__Bacteria;p__Proteobacteria;c__Alphaproteobacteria;o__Rhodobacterales;f__Rhodobacteraceae;g__Marivita;	1.08197005106899e-05	1.40479102969227e-09	1.08197005106899e-05	0	0	0	0.00390616547157246	0.0171665693092789
k__Bacteria;p__Proteobacteria;c__Alphaproteobacteria;o__Rhizobiales;f__Beijerinckiaceae;g__Microvirga;	0	0	0	1.92350231301153e-05	1.82890863573853e-09	1.2345406148775e-05	0.000999000999000999	0.00490685784803432
k__Bacteria;p__Firmicutes;c__Clostridia;o__Peptostreptococcales-Tissierellales;f__Anaerovoracaceae;g__Anaerovorax;	9.61751156505766e-06	1.10995834444821e-09	9.61751156505766e-06	0	0	0	0.00781236851109781	0.0322139639840329
k__Bacteria;p__Actinobacteriota;c__Coriobacteriia;o__Coriobacteriales;f__Eggerthellaceae;g__Enterorhabdus;	1.08197005106899e-05	1.10207511757003e-09	9.58329761255675e-06	4.80875578252883e-06	2.77489586112053e-10	4.80875578252883e-06	0.266843814425918	0.428489586626233
k__Bacteria;p__Proteobacteria;c__Alphaproteobacteria;o__Rhodobacterales;f__Rhodobacteraceae;g__Ruegeria;	9.61751156505766e-06	1.10995834444821e-09	9.61751156505766e-06	0	0	0	0.00781236851109781	0.0322139639840329
k__Bacteria;p__Firmicutes;c__Clostridia;o__Eubacteriales;f__Eubacteriaceae;g__Eubacterium;	2.40437789126441e-06	6.93723965280133e-11	2.40437789126441e-06	9.61751156505766e-06	1.10995834444821e-09	9.61751156505766e-06	0.109373943387987	0.265922607807575
k__Bacteria;p__Firmicutes;c__Bacilli;o__Lactobacillales;f__Lactobacillaceae;g__Leuconostoc;	9.61751156505766e-06	1.10995834444821e-09	9.61751156505766e-06	9.61751156505766e-06	1.10995834444821e-09	9.61751156505766e-06	1	1
k__Bacteria;p__Proteobacteria;c__Gammaproteobacteria;o__Enterobacterales;f__Enterobacteriaceae;g__Citrobacter;	8.41532261942545e-06	8.49811857468163e-10	8.41532261942545e-06	9.61751156505766e-06	1.10995834444821e-09	9.61751156505766e-06	1	1
k__Bacteria;p__Firmicutes;c__Clostridia;o__Lachnospirales;f__Lachnospiraceae;g__Agathobacter;	1.68306452388509e-05	1.58295195713921e-09	1.14853238132381e-05	0	0	0	0.000999000999000999	0.00490685784803432
k__Bacteria;p__Proteobacteria;c__Alphaproteobacteria;o__Acetobacterales;f__Acetobacteraceae;g__Komagataeibacter;	9.61751156505766e-06	1.10995834444821e-09	9.61751156505766e-06	0	0	0	0.00781236851109781	0.0322139639840329
k__Bacteria;p__Proteobacteria;c__Gammaproteobacteria;o__Burkholderiales;f__Comamonadaceae;g__Azohydromonas;	0	0	0	9.61751156505766e-06	1.10995834444821e-09	9.61751156505766e-06	0.00781236851109781	0.0322139639840329
k__Bacteria;p__Firmicutes;c__Negativicutes;o__Veillonellales-Selenomonadales;f__Selenomonadaceae;g__Megamonas;	9.61751156505766e-06	8.45081921341253e-10	8.39187067614274e-06	0	0	0	0.00781236851109781	0.0322139639840329
k__Bacteria;p__Proteobacteria;c__Gammaproteobacteria;o__Burkholderiales;f__Comamonadaceae;g__Acidovorax;	8.41532261942545e-06	8.49811857468163e-10	8.41532261942545e-06	0	0	0	0.0156248027663503	0.0573481771863847
k__Bacteria;p__Bacteroidota;c__Bacteroidia;o__Bacteroidales;f__Rikenellaceae;g__Rikenella;	8.41532261942545e-06	8.49811857468163e-10	8.41532261942545e-06	6.01094472816104e-06	4.33577478300083e-10	6.01094472816104e-06	0.774413248905082	0.883703327389334
k__Bacteria;p__Bacteroidota;c__Bacteroidia;o__Sphingobacteriales;f__Sphingobacteriaceae;g__Pedobacter;	1.92350231301153e-05	1.48835323460101e-09	1.11368503723787e-05	7.21313367379324e-06	6.2435156875212e-10	7.21313367379324e-06	0.198801198801199	0.399997592768677
k__Bacteria;p__Actinobacteriota;c__Actinobacteria;o__Frankiales;f__Geodermatophilaceae;g__Blastococcus;	8.41532261942545e-06	8.49811857468163e-10	8.41532261942545e-06	6.01094472816104e-06	4.33577478300083e-10	6.01094472816104e-06	0.774413248905082	0.883703327389334
k__Bacteria;p__Bacteroidota;c__Bacteroidia;o__Cytophagales;f__Cytophagaceae;g__Sporocytophaga;	0	0	0	8.41532261942545e-06	8.49811857468163e-10	8.41532261942545e-06	0.0156248027663503	0.0573481771863847
k__Bacteria;p__Actinobacteriota;c__Actinobacteria;o__Micrococcales;f__Micrococcaceae;g__Glutamicibacter;	1.20218894563221e-06	1.73430991320033e-11	1.20218894563221e-06	8.41532261942545e-06	8.49811857468163e-10	8.41532261942545e-06	0.0703118425531179	0.192493077153618
k__Bacteria;p__Actinobacteriota;c__Actinobacteria;o__Micrococcales;f__Dermatophilaceae;g__Austwickia;	0	0	0	8.41532261942545e-06	8.49811857468163e-10	8.41532261942545e-06	0.0156248027663503	0.0573481771863847
k__Bacteria;p__Firmicutes;c__Bacilli;o__Erysipelotrichales;f__Erysipelotrichaceae;g__Holdemanella;	8.41532261942545e-06	8.49811857468163e-10	8.41532261942545e-06	0	0	0	0.0156248027663503	0.0573481771863847
k__Bacteria;p__Proteobacteria;c__Alphaproteobacteria;o__Holosporales;f__Holosporaceae;g__Holospora;	8.41532261942545e-06	8.49811857468163e-10	8.41532261942545e-06	0	0	0	0.0156248027663503	0.0573481771863847
k__Bacteria;p__Bacteroidota;c__Bacteroidia;o__Cytophagales;f__Hymenobacteraceae;g__Hymenobacter;	7.21313367379324e-06	6.2435156875212e-10	7.21313367379324e-06	0	0	0	0.0312497182373046	0.0984660933137711
k__Bacteria;p__Bacteroidota;c__Bacteroidia;o__Bacteroidales;f__Rikenellaceae;g__Anaerocella;	7.21313367379324e-06	6.2435156875212e-10	7.21313367379324e-06	0	0	0	0.0312497182373046	0.0984660933137711
k__Bacteria;p__Firmicutes;c__Clostridia;o__Lachnospirales;f__Lachnospiraceae;g__Frisingicoccus;	7.21313367379324e-06	6.2435156875212e-10	7.21313367379324e-06	0	0	0	0.0312497182373046	0.0984660933137711
k__Bacteria;p__Verrucomicrobiota;c__Verrucomicrobiae;o__Chthoniobacterales;f__Chthoniobacteraceae;g__LD29;	0	0	0	7.21313367379324e-06	6.2435156875212e-10	7.21313367379324e-06	0.0312497182373046	0.0984660933137711
k__Bacteria;p__Proteobacteria;c__Gammaproteobacteria;o__Pseudomonadales;f__Moraxellaceae;g__Enhydrobacter;	9.61751156505766e-06	3.91008053157893e-10	5.70824004661896e-06	7.21313367379324e-06	6.2435156875212e-10	7.21313367379324e-06	0.790526462354711	0.895036740428723
k__Bacteria;p__Proteobacteria;c__Alphaproteobacteria;o__Acetobacterales;f__Acetobacteraceae;g__Acetobacter;	7.21313367379324e-06	6.2435156875212e-10	7.21313367379324e-06	0	0	0	0.0312497182373046	0.0984660933137711
k__Bacteria;p__Firmicutes;c__Bacilli;o__Paenibacillales;f__Paenibacillaceae;g__Paenibacillus;	7.21313367379324e-06	6.2435156875212e-10	7.21313367379324e-06	0	0	0	0.0312497182373046	0.0984660933137711
k__Bacteria;p__Bacteroidota;c__Bacteroidia;o__Chitinophagales;f__Chitinophagaceae;g__Terrimonas;	7.21313367379324e-06	6.2435156875212e-10	7.21313367379324e-06	0	0	0	0.0312497182373046	0.0984660933137711
k__Bacteria;p__Proteobacteria;c__Alphaproteobacteria;o__Rhizobiales;f__Xanthobacteraceae;g__Bradyrhizobium;	7.21313367379324e-06	6.2435156875212e-10	7.21313367379324e-06	0	0	0	0.0312497182373046	0.0984660933137711
k__Bacteria;p__Firmicutes;c__Clostridia;o__Lachnospirales;f__Lachnospiraceae;g__Acetatifactor;	7.21313367379324e-06	6.2435156875212e-10	7.21313367379324e-06	0	0	0	0.0312497182373046	0.0984660933137711
k__Bacteria;p__Firmicutes;c__Bacilli;o__Erysipelotrichales;f__Erysipelatoclostridiaceae;g__Erysipelotrichaceae_UCG-003;	6.01094472816104e-06	4.33577478300083e-10	6.01094472816104e-06	0	0	0	0.0624996243160674	0.176646882529235
k__Bacteria;p__Desulfobacterota;c__Desulfobacteria;o__Desulfobacterales;f__Desulfosarcinaceae;g__Desulfatitalea;	6.01094472816104e-06	4.33577478300083e-10	6.01094472816104e-06	0	0	0	0.0624996243160674	0.176646882529235
k__Bacteria;p__Firmicutes;c__Clostridia;o__Peptostreptococcales-Tissierellales;f__Peptostreptococcaceae;g__Clostridioides;	6.01094472816104e-06	4.33577478300083e-10	6.01094472816104e-06	0	0	0	0.0624996243160674	0.176646882529235
k__Bacteria;p__Bacteroidota;c__Bacteroidia;o__Bacteroidales;f__Rikenellaceae;g__dgA-11_gut_group;	6.01094472816104e-06	4.33577478300083e-10	6.01094472816104e-06	0	0	0	0.0624996243160674	0.176646882529235
k__Bacteria;p__Chloroflexi;c__Chloroflexia;o__Thermomicrobiales;f__JG30-KF-CM45;g__unidentified_JG30-KF-CM45;	6.01094472816104e-06	4.33577478300083e-10	6.01094472816104e-06	0	0	0	0.0624996243160674	0.176646882529235
k__Bacteria;p__Firmicutes;c__Bacilli;o__Erysipelotrichales;f__Erysipelatoclostridiaceae;g__Catenibacterium;	6.01094472816104e-06	4.33577478300083e-10	6.01094472816104e-06	0	0	0	0.0624996243160674	0.176646882529235
k__Bacteria;p__Firmicutes;c__Clostridia;o__Lachnospirales;f__Lachnospiraceae;g__Lachnospiraceae_UCG-004;	6.01094472816104e-06	4.33577478300083e-10	6.01094472816104e-06	0	0	0	0.0624996243160674	0.176646882529235
k__Bacteria;p__Proteobacteria;c__Gammaproteobacteria;o__Beggiatoales;f__Beggiatoaceae;g__Thioploca;	6.01094472816104e-06	4.33577478300083e-10	6.01094472816104e-06	0	0	0	0.0624996243160674	0.176646882529235
k__Bacteria;p__Firmicutes;c__Clostridia;o__Lachnospirales;f__Lachnospiraceae;g__Anaerostipes;	8.41532261942545e-06	4.71416967315363e-10	6.2677545641386e-06	0	0	0	0.0156248027663503	0.0573481771863847
k__Bacteria;p__Proteobacteria;c__Gammaproteobacteria;o__Burkholderiales;f__Comamonadaceae;g__Tepidimonas;	7.21313367379324e-06	4.3515412367572e-10	6.02186380115354e-06	0	0	0	0.0312497182373046	0.0984660933137711
k__Bacteria;p__Actinobacteriota;c__Actinobacteria;o__Micrococcales;f__Microbacteriaceae;g__Leucobacter;	0	0	0	8.41532261942545e-06	4.71416967315363e-10	6.2677545641386e-06	0.0156248027663503	0.0573481771863847
k__Bacteria;p__Firmicutes;c__Negativicutes;o__Veillonellales-Selenomonadales;f__Selenomonadaceae;g__Selenomonas;	4.80875578252883e-06	2.77489586112053e-10	4.80875578252883e-06	0	0	0	0.12499954917901	0.265922607807575
k__Bacteria;p__Proteobacteria;c__Alphaproteobacteria;o__Caulobacterales;f__Caulobacteraceae;g__Phenylobacterium;	4.80875578252883e-06	2.77489586112053e-10	4.80875578252883e-06	2.40437789126441e-06	6.93723965280133e-11	2.40437789126441e-06	0.687499436472577	0.828970439645634
k__Bacteria;p__Firmicutes;c__Clostridia;o__Lachnospirales;f__Lachnospiraceae;g__Lachnospiraceae_UCG-010;	4.80875578252883e-06	2.77489586112053e-10	4.80875578252883e-06	0	0	0	0.12499954917901	0.265922607807575
k__Bacteria;p__Firmicutes;c__Clostridia;o__Lachnospirales;f__Lachnospiraceae;g__[Eubacterium]_eligens_group;	4.80875578252883e-06	2.77489586112053e-10	4.80875578252883e-06	0	0	0	0.12499954917901	0.265922607807575
k__Bacteria;p__Thermotogota;c__Thermotogae;o__Petrotogales;f__Petrotogaceae;g__Defluviitoga;	4.80875578252883e-06	2.77489586112053e-10	4.80875578252883e-06	0	0	0	0.12499954917901	0.265922607807575
k__Bacteria;p__Actinobacteriota;c__Actinobacteria;o__Actinomycetales;f__Actinomycetaceae;g__Flaviflexus;	0	0	0	4.80875578252883e-06	2.77489586112053e-10	4.80875578252883e-06	0.12499954917901	0.265922607807575
k__Bacteria;p__Firmicutes;c__Bacilli;o__Lactobacillales;f__Carnobacteriaceae;g__Alloiococcus;	0	0	0	4.80875578252883e-06	2.77489586112053e-10	4.80875578252883e-06	0.12499954917901	0.265922607807575
k__Bacteria;p__Firmicutes;c__Bacilli;o__Erysipelotrichales;f__Erysipelatoclostridiaceae;g__Candidatus_Stoquefichus;	0	0	0	4.80875578252883e-06	2.77489586112053e-10	4.80875578252883e-06	0.12499954917901	0.265922607807575
k__Bacteria;p__Firmicutes;c__Clostridia;o__Lachnospirales;f__Lachnospiraceae;g__Lachnospira;	4.80875578252883e-06	2.77489586112053e-10	4.80875578252883e-06	0	0	0	0.12499954917901	0.265922607807575
k__Bacteria;p__Firmicutes;c__Bacilli;o__Lactobacillales;f__Aerococcaceae;g__Dolosicoccus;	4.80875578252883e-06	2.77489586112053e-10	4.80875578252883e-06	0	0	0	0.12499954917901	0.265922607807575
k__Bacteria;p__Firmicutes;c__Clostridia;o__Oscillospirales;f__Ruminococcaceae;g__Anaerofilum;	4.80875578252883e-06	2.77489586112053e-10	4.80875578252883e-06	0	0	0	0.12499954917901	0.265922607807575
k__Bacteria;p__Actinobacteriota;c__Actinobacteria;o__Frankiales;f__Geodermatophilaceae;g__Geodermatophilus;	4.80875578252883e-06	2.77489586112053e-10	4.80875578252883e-06	0	0	0	0.12499954917901	0.265922607807575
k__Bacteria;p__Firmicutes;c__Clostridia;o__Lachnospirales;f__Lachnospiraceae;g__Lachnoanaerobaculum;	4.80875578252883e-06	2.77489586112053e-10	4.80875578252883e-06	0	0	0	0.12499954917901	0.265922607807575
k__Bacteria;p__Firmicutes;c__Clostridia;o__Lachnospirales;f__Lachnospiraceae;g__[Ruminococcus]_gnavus_group;	8.41532261942545e-06	3.95737989284803e-10	5.74266190661906e-06	0	0	0	0.0156248027663503	0.0573481771863847
k__Bacteria;p__Proteobacteria;c__Alphaproteobacteria;o__Sphingomonadales;f__Sphingomonadaceae;g__Sphingobium;	4.80875578252883e-06	2.77489586112053e-10	4.80875578252883e-06	1.20218894563221e-06	1.73430991320033e-11	1.20218894563221e-06	0.37499924863078	0.559150665369109
k__Bacteria;p__Actinobacteriota;c__Actinobacteria;o__Frankiales;f__Frankiaceae;g__Jatrophihabitans;	0	0	0	4.80875578252883e-06	2.77489586112053e-10	4.80875578252883e-06	0.12499954917901	0.265922607807575
k__Bacteria;p__Actinobacteriota;c__Actinobacteria;o__Micrococcales;f__Micrococcaceae;g__Micrococcus;	8.41532261942545e-06	3.95737989284803e-10	5.74266190661906e-06	0	0	0	0.0156248027663503	0.0573481771863847
k__Bacteria;p__Proteobacteria;c__Gammaproteobacteria;o__Burkholderiales;f__Burkholderiaceae;g__Lautropia;	4.80875578252883e-06	2.77489586112053e-10	4.80875578252883e-06	0	0	0	0.12499954917901	0.265922607807575
k__Bacteria;p__Firmicutes;c__Bacilli;o__Bacillales;f__Planococcaceae;g__Savagea;	0	0	0	6.01094472816104e-06	2.82219522238963e-10	4.84956632286987e-06	0.0624996243160674	0.176646882529235
k__Bacteria;p__Proteobacteria;c__Gammaproteobacteria;o__Pseudomonadales;f__Halieaceae;g__Halioglobus;	3.60656683689662e-06	1.5608789218803e-10	3.60656683689662e-06	0	0	0	0.249999549178874	0.403380915100213
k__Bacteria;p__Bacteroidota;c__Bacteroidia;o__Flavobacteriales;f__Weeksellaceae;g__Soonwooa;	3.60656683689662e-06	1.5608789218803e-10	3.60656683689662e-06	0	0	0	0.249999549178874	0.403380915100213
k__Bacteria;p__Bacteroidota;c__Bacteroidia;o__Bacteroidales;f__Rikenellaceae;g__Rikenellaceae_RC9_gut_group;	4.80875578252883e-06	1.63971119066213e-10	3.69651997454152e-06	0	0	0	0.12499954917901	0.265922607807575
k__Bacteria;p__Firmicutes;c__Bacilli;o__Brevibacillales;f__Brevibacillaceae;g__Brevibacillus;	0	0	0	3.60656683689662e-06	1.5608789218803e-10	3.60656683689662e-06	0.249999549178874	0.403380915100213
k__Bacteria;p__Proteobacteria;c__Alphaproteobacteria;o__Rhizobiales;f__Hyphomicrobiaceae;g__Hyphomicrobium;	3.60656683689662e-06	1.5608789218803e-10	3.60656683689662e-06	0	0	0	0.249999549178874	0.403380915100213
k__Bacteria;p__Proteobacteria;c__Gammaproteobacteria;o__Burkholderiales;f__Comamonadaceae;g__Limnohabitans;	3.60656683689662e-06	1.5608789218803e-10	3.60656683689662e-06	0	0	0	0.249999549178874	0.403380915100213
k__Bacteria;p__Actinobacteriota;c__Thermoleophilia;o__Solirubrobacterales;f__Solirubrobacteraceae;g__JCM_18997;	3.60656683689662e-06	1.5608789218803e-10	3.60656683689662e-06	0	0	0	0.249999549178874	0.403380915100213
k__Bacteria;p__Actinobacteriota;c__Actinobacteria;o__Micrococcales;f__Micrococcaceae;g__Arthrobacter;	3.60656683689662e-06	1.5608789218803e-10	3.60656683689662e-06	0	0	0	0.249999549178874	0.403380915100213
k__Bacteria;p__Firmicutes;c__Clostridia;o__Peptostreptococcales-Tissierellales;f__Anaerovoracaceae;g__[Eubacterium]_nodatum_group;	6.01094472816104e-06	2.06540544208403e-10	4.14870003945416e-06	3.60656683689662e-06	1.5608789218803e-10	3.60656683689662e-06	0.726561842550747	0.853999147705441
k__Bacteria;p__Firmicutes;c__Clostridia;o__Lachnospirales;f__Lachnospiraceae;g__Lachnospiraceae_UCG-001;	3.60656683689662e-06	1.5608789218803e-10	3.60656683689662e-06	0	0	0	0.249999549178874	0.403380915100213
k__Bacteria;p__Actinobacteriota;c__Coriobacteriia;o__Coriobacteriales;f__Atopobiaceae;g__Libanicoccus;	3.60656683689662e-06	1.5608789218803e-10	3.60656683689662e-06	0	0	0	0.249999549178874	0.403380915100213
k__Bacteria;p__Firmicutes;c__Bacilli;o__Erysipelotrichales;f__Erysipelatoclostridiaceae;g__UCG-004;	3.60656683689662e-06	1.5608789218803e-10	3.60656683689662e-06	0	0	0	0.249999549178874	0.403380915100213
k__Bacteria;p__Firmicutes;c__Clostridia;o__Lachnospirales;f__Lachnospiraceae;g__Lachnospiraceae_UCG-006;	3.60656683689662e-06	1.5608789218803e-10	3.60656683689662e-06	0	0	0	0.249999549178874	0.403380915100213
k__Bacteria;p__Actinobacteriota;c__Actinobacteria;o__Micrococcales;f__Micrococcaceae;g__Nesterenkonia;	3.60656683689662e-06	1.5608789218803e-10	3.60656683689662e-06	0	0	0	0.249999549178874	0.403380915100213
k__Bacteria;p__Actinobacteriota;c__Actinobacteria;o__Corynebacteriales;f__Mycobacteriaceae;g__Mycobacterium;	3.60656683689662e-06	1.5608789218803e-10	3.60656683689662e-06	0	0	0	0.249999549178874	0.403380915100213
k__Bacteria;p__Firmicutes;c__Clostridia;o__Peptostreptococcales-Tissierellales;f__Peptostreptococcaceae;g__Paeniclostridium;	3.60656683689662e-06	1.5608789218803e-10	3.60656683689662e-06	0	0	0	0.249999549178874	0.403380915100213
k__Bacteria;p__Cyanobacteria;c__Vampirivibrionia;o__Gastranaerophilales;f__unidentified_Gastranaerophilales;g__unidentified_Gastranaerophilales;	3.60656683689662e-06	1.5608789218803e-10	3.60656683689662e-06	0	0	0	0.249999549178874	0.403380915100213
k__Bacteria;p__Firmicutes;c__Bacilli;o__Lactobacillales;f__Lactobacillaceae;g__HT002;	0	0	0	3.60656683689662e-06	1.5608789218803e-10	3.60656683689662e-06	0.249999549178874	0.403380915100213
k__Bacteria;p__Actinobacteriota;c__Actinobacteria;o__Propionibacteriales;f__Nocardioidaceae;g__Nocardioides;	3.60656683689662e-06	1.5608789218803e-10	3.60656683689662e-06	0	0	0	0.249999549178874	0.403380915100213
k__Bacteria;p__Firmicutes;c__Clostridia;o__Peptostreptococcales-Tissierellales;f__Family_XI;g__Helcococcus;	3.60656683689662e-06	1.5608789218803e-10	3.60656683689662e-06	0	0	0	0.249999549178874	0.403380915100213
k__Bacteria;p__Actinobacteriota;c__Coriobacteriia;o__Coriobacteriales;f__Eggerthellaceae;g__DNF00809;	3.60656683689662e-06	1.5608789218803e-10	3.60656683689662e-06	0	0	0	0.249999549178874	0.403380915100213
k__Bacteria;p__Bdellovibrionota;c__Bdellovibrionia;o__Bacteriovoracales;f__Bacteriovoracaceae;g__Peredibacter;	3.60656683689662e-06	1.5608789218803e-10	3.60656683689662e-06	0	0	0	0.249999549178874	0.403380915100213
k__Bacteria;p__Proteobacteria;c__Alphaproteobacteria;o__Rhizobiales;f__Rhizobiaceae;g__Pseudochrobactrum;	3.60656683689662e-06	1.5608789218803e-10	3.60656683689662e-06	0	0	0	0.249999549178874	0.403380915100213
k__Bacteria;p__Firmicutes;c__Clostridia;o__Lachnospirales;f__Lachnospiraceae;g__[Ruminococcus]_gauvreauii_group;	3.60656683689662e-06	1.5608789218803e-10	3.60656683689662e-06	0	0	0	0.249999549178874	0.403380915100213
k__Bacteria;p__Proteobacteria;c__Gammaproteobacteria;o__Enterobacterales;f__Yersiniaceae;g__Serratia;	3.60656683689662e-06	1.5608789218803e-10	3.60656683689662e-06	3.60656683689662e-06	1.5608789218803e-10	3.60656683689662e-06	1	1
k__Bacteria;p__Actinobacteriota;c__Actinobacteria;o__Propionibacteriales;f__Propionibacteriaceae;g__Friedmanniella;	0	0	0	3.60656683689662e-06	1.5608789218803e-10	3.60656683689662e-06	0.249999549178874	0.403380915100213
k__Bacteria;p__Bacteroidota;c__Bacteroidia;o__Flavobacteriales;f__Weeksellaceae;g__Elizabethkingia;	3.60656683689662e-06	1.5608789218803e-10	3.60656683689662e-06	0	0	0	0.249999549178874	0.403380915100213
k__Bacteria;p__Proteobacteria;c__Gammaproteobacteria;o__Burkholderiales;f__Sutterellaceae;g__Sutterella;	3.60656683689662e-06	1.5608789218803e-10	3.60656683689662e-06	0	0	0	0.249999549178874	0.403380915100213
k__Bacteria;p__Bacteroidota;c__Bacteroidia;o__Bacteroidales;f__Barnesiellaceae;g__Barnesiella;	8.41532261942545e-06	2.82219522238963e-10	4.84956632286987e-06	1.20218894563221e-06	1.73430991320033e-11	1.20218894563221e-06	0.0703118425531179	0.192493077153618
k__Bacteria;p__Firmicutes;c__Bacilli;o__Erysipelotrichales;f__Erysipelotrichaceae;g__Dubosiella;	2.40437789126441e-06	6.93723965280133e-11	2.40437789126441e-06	3.60656683689662e-06	1.5608789218803e-10	3.60656683689662e-06	1	1
k__Bacteria;p__Firmicutes;c__Negativicutes;o__Veillonellales-Selenomonadales;f__Veillonellaceae;g__Megasphaera;	3.60656683689662e-06	1.5608789218803e-10	3.60656683689662e-06	0	0	0	0.249999549178874	0.403380915100213
k__Bacteria;p__Proteobacteria;c__Alphaproteobacteria;o__Rhizobiales;f__Xanthobacteraceae;g__unidentified_Xanthobacteraceae;	3.60656683689662e-06	1.5608789218803e-10	3.60656683689662e-06	0	0	0	0.249999549178874	0.403380915100213
k__Bacteria;p__Firmicutes;c__Negativicutes;o__Veillonellales-Selenomonadales;f__Sporomusaceae;g__Sporomusa;	0	0	0	3.60656683689662e-06	1.5608789218803e-10	3.60656683689662e-06	0.249999549178874	0.403380915100213
k__Bacteria;p__Firmicutes;c__Bacilli;o__Bacillales;f__Planococcaceae;g__Planococcus;	3.60656683689662e-06	1.5608789218803e-10	3.60656683689662e-06	0	0	0	0.249999549178874	0.403380915100213
k__Bacteria;p__Firmicutes;c__Bacilli;o__Erysipelotrichales;f__Erysipelotrichaceae;g__[Clostridium]_innocuum_group;	3.60656683689662e-06	1.5608789218803e-10	3.60656683689662e-06	0	0	0	0.249999549178874	0.403380915100213
k__Bacteria;p__Proteobacteria;c__Gammaproteobacteria;o__Enterobacterales;f__Pasteurellaceae;g__Actinobacillus;	3.60656683689662e-06	1.5608789218803e-10	3.60656683689662e-06	0	0	0	0.249999549178874	0.403380915100213
k__Bacteria;p__Firmicutes;c__Bacilli;o__Staphylococcales;f__Staphylococcaceae;g__Salinicoccus;	0	0	0	2.40437789126441e-06	6.93723965280133e-11	2.40437789126441e-06	0.499999699452583	0.623133953795383
k__Bacteria;p__Firmicutes;c__Clostridia;o__Peptostreptococcales-Tissierellales;f__Anaerovoracaceae;g__[Eubacterium]_brachy_group;	2.40437789126441e-06	6.93723965280133e-11	2.40437789126441e-06	0	0	0	0.499999699452583	0.623133953795383
k__Bacteria;p__Proteobacteria;c__Gammaproteobacteria;o__Burkholderiales;f__Nitrosomonadaceae;g__MND1;	0	0	0	2.40437789126441e-06	6.93723965280133e-11	2.40437789126441e-06	0.499999699452583	0.623133953795383
k__Bacteria;p__Firmicutes;c__Bacilli;o__Erysipelotrichales;f__Erysipelotrichaceae;g__Solobacterium;	2.40437789126441e-06	6.93723965280133e-11	2.40437789126441e-06	0	0	0	0.499999699452583	0.623133953795383
k__Bacteria;p__Actinobacteriota;c__Coriobacteriia;o__Coriobacteriales;f__Eggerthellaceae;g__Eggerthella;	2.40437789126441e-06	6.93723965280133e-11	2.40437789126441e-06	0	0	0	0.499999699452583	0.623133953795383
k__Bacteria;p__Proteobacteria;c__Gammaproteobacteria;o__Cardiobacteriales;f__Wohlfahrtiimonadaceae;g__Ignatzschineria;	2.40437789126441e-06	6.93723965280133e-11	2.40437789126441e-06	0	0	0	0.499999699452583	0.623133953795383
k__Bacteria;p__Proteobacteria;c__Gammaproteobacteria;o__Burkholderiales;f__Comamonadaceae;g__Comamonas;	2.40437789126441e-06	6.93723965280133e-11	2.40437789126441e-06	0	0	0	0.499999699452583	0.623133953795383
k__Bacteria;p__Bacteroidota;c__Bacteroidia;o__Flavobacteriales;f__Crocinitomicaceae;g__Fluviicola;	2.40437789126441e-06	6.93723965280133e-11	2.40437789126441e-06	0	0	0	0.499999699452583	0.623133953795383
k__Bacteria;p__Actinobacteriota;c__Actinobacteria;o__Micrococcales;f__Dermabacteraceae;g__Dermabacter;	0	0	0	2.40437789126441e-06	6.93723965280133e-11	2.40437789126441e-06	0.499999699452583	0.623133953795383
k__Bacteria;p__Deinococcota;c__Deinococci;o__Deinococcales;f__Deinococcaceae;g__Deinococcus;	2.40437789126441e-06	6.93723965280133e-11	2.40437789126441e-06	0	0	0	0.499999699452583	0.623133953795383
k__Bacteria;p__Proteobacteria;c__Alphaproteobacteria;o__Sphingomonadales;f__Sphingomonadaceae;g__Qipengyuania;	2.40437789126441e-06	6.93723965280133e-11	2.40437789126441e-06	0	0	0	0.499999699452583	0.623133953795383
k__Bacteria;p__Bacteroidota;c__Bacteroidia;o__Chitinophagales;f__Chitinophagaceae;g__unidentified_Chitinophagaceae;	2.40437789126441e-06	6.93723965280133e-11	2.40437789126441e-06	0	0	0	0.499999699452583	0.623133953795383
k__Bacteria;p__Firmicutes;c__Clostridia;o__Clostridiales;f__Clostridiaceae;g__Clostridium_sensu_stricto_18;	2.40437789126441e-06	6.93723965280133e-11	2.40437789126441e-06	0	0	0	0.499999699452583	0.623133953795383
k__Bacteria;p__Proteobacteria;c__Alphaproteobacteria;o__Sphingomonadales;f__Sphingomonadaceae;g__Novosphingobium;	4.80875578252883e-06	1.26131630050933e-10	3.24206248720026e-06	0	0	0	0.12499954917901	0.265922607807575
k__Bacteria;p__Proteobacteria;c__Gammaproteobacteria;o__Burkholderiales;f__Comamonadaceae;g__Aquabacterium;	2.40437789126441e-06	6.93723965280133e-11	2.40437789126441e-06	0	0	0	0.499999699452583	0.623133953795383
k__Bacteria;p__Patescibacteria;c__WWE3;o__unidentified_WWE3;f__unidentified_WWE3;g__unidentified_WWE3;	0	0	0	2.40437789126441e-06	6.93723965280133e-11	2.40437789126441e-06	0.499999699452583	0.623133953795383
k__Bacteria;p__Firmicutes;c__Clostridia;o__Lachnospirales;f__Lachnospiraceae;g__A2;	2.40437789126441e-06	6.93723965280133e-11	2.40437789126441e-06	0	0	0	0.499999699452583	0.623133953795383
k__Bacteria;p__Proteobacteria;c__Gammaproteobacteria;o__Xanthomonadales;f__Xanthomonadaceae;g__Luteimonas;	2.40437789126441e-06	6.93723965280133e-11	2.40437789126441e-06	0	0	0	0.499999699452583	0.623133953795383
k__Bacteria;p__Proteobacteria;c__Gammaproteobacteria;o__Burkholderiales;f__Comamonadaceae;g__Schlegelella;	2.40437789126441e-06	6.93723965280133e-11	2.40437789126441e-06	0	0	0	0.499999699452583	0.623133953795383
k__Bacteria;p__Firmicutes;c__Clostridia;o__Lachnospirales;f__Lachnospiraceae;g__Lachnotalea;	2.40437789126441e-06	6.93723965280133e-11	2.40437789126441e-06	0	0	0	0.499999699452583	0.623133953795383
k__Bacteria;p__Firmicutes;c__Clostridia;o__Oscillospirales;f__Oscillospiraceae;g__UCG-007;	2.40437789126441e-06	6.93723965280133e-11	2.40437789126441e-06	0	0	0	0.499999699452583	0.623133953795383
k__Bacteria;p__Bacteroidota;c__Bacteroidia;o__Flavobacteriales;f__Flavobacteriaceae;g__Bizionia;	0	0	0	1.20218894563221e-06	1.73430991320033e-11	1.20218894563221e-06	1	1
k__Bacteria;p__Proteobacteria;c__Alphaproteobacteria;o__Rhizobiales;f__Devosiaceae;g__Devosia;	1.20218894563221e-06	1.73430991320033e-11	1.20218894563221e-06	0	0	0	1	1
k__Bacteria;p__Firmicutes;c__Desulfitobacteriia;o__Desulfitobacteriales;f__Desulfitobacteriaceae;g__Desulfosporosinus;	1.20218894563221e-06	1.73430991320033e-11	1.20218894563221e-06	0	0	0	1	1
k__Bacteria;p__Firmicutes;c__Clostridia;o__Lachnospirales;f__Defluviitaleaceae;g__Defluviitaleaceae_UCG-011;	1.20218894563221e-06	1.73430991320033e-11	1.20218894563221e-06	0	0	0	1	1
k__Bacteria;p__Proteobacteria;c__Alphaproteobacteria;o__Ferrovibrionales;f__Ferrovibrionaceae;g__Ferrovibrio;	0	0	0	1.20218894563221e-06	1.73430991320033e-11	1.20218894563221e-06	1	1
k__Bacteria;p__Firmicutes;c__Limnochordia;o__unidentified_Limnochordia;f__unidentified_Limnochordia;g__Hydrogenispora;	1.20218894563221e-06	1.73430991320033e-11	1.20218894563221e-06	0	0	0	1	1
k__Bacteria;p__Proteobacteria;c__Alphaproteobacteria;o__Rhizobiales;f__Beijerinckiaceae;g__Bosea;	0	0	0	1.20218894563221e-06	1.73430991320033e-11	1.20218894563221e-06	1	1
k__Bacteria;p__Actinobacteriota;c__Actinobacteria;o__Micrococcales;f__Cellulomonadaceae;g__Oerskovia;	1.20218894563221e-06	1.73430991320033e-11	1.20218894563221e-06	0	0	0	1	1
k__Bacteria;p__Proteobacteria;c__Alphaproteobacteria;o__Sphingomonadales;f__Sphingomonadaceae;g__Porphyrobacter;	0	0	0	1.20218894563221e-06	1.73430991320033e-11	1.20218894563221e-06	1	1
k__Bacteria;p__Acidobacteriota;c__Acidobacteriae;o__Acidobacteriales;f__unidentified_Acidobacteriales;g__unidentified_Acidobacteriales;	0	0	0	1.20218894563221e-06	1.73430991320033e-11	1.20218894563221e-06	1	1
k__Bacteria;p__Proteobacteria;c__Alphaproteobacteria;o__Rickettsiales;f__Anaplasmataceae;g__Wolbachia;	1.20218894563221e-06	1.73430991320033e-11	1.20218894563221e-06	0	0	0	1	1
k__Bacteria;p__Verrucomicrobiota;c__Lentisphaeria;o__Victivallales;f__Victivallaceae;g__Victivallis;	1.20218894563221e-06	1.73430991320033e-11	1.20218894563221e-06	0	0	0	1	1
k__Bacteria;p__Bacteroidota;c__Bacteroidia;o__Chitinophagales;f__Chitinophagaceae;g__Sediminibacterium;	1.20218894563221e-06	1.73430991320033e-11	1.20218894563221e-06	0	0	0	1	1
k__Bacteria;p__Firmicutes;c__Negativicutes;o__Veillonellales-Selenomonadales;f__Sporomusaceae;g__Acetonema;	1.20218894563221e-06	1.73430991320033e-11	1.20218894563221e-06	0	0	0	1	1
k__Bacteria;p__Firmicutes;c__Bacilli;o__Bacillales;f__Planococcaceae;g__Bhargavaea;	1.20218894563221e-06	1.73430991320033e-11	1.20218894563221e-06	0	0	0	1	1
k__Bacteria;p__Proteobacteria;c__Alphaproteobacteria;o__Sphingomonadales;f__Sphingomonadaceae;g__Sphingopyxis;	0	0	0	1.20218894563221e-06	1.73430991320033e-11	1.20218894563221e-06	1	1
k__Bacteria;p__Proteobacteria;c__Gammaproteobacteria;o__Burkholderiales;f__Burkholderiaceae;g__Limnobacter;	0	0	0	1.20218894563221e-06	1.73430991320033e-11	1.20218894563221e-06	1	1
k__Bacteria;p__Bacteroidota;c__Bacteroidia;o__Sphingobacteriales;f__Sphingobacteriaceae;g__Olivibacter;	1.20218894563221e-06	1.73430991320033e-11	1.20218894563221e-06	0	0	0	1	1
k__Bacteria;p__Firmicutes;c__Thermacetogenia;o__Thermacetogeniales;f__Thermacetogeniaceae;g__Syntrophaceticus;	1.20218894563221e-06	1.73430991320033e-11	1.20218894563221e-06	0	0	0	1	1
k__Bacteria;p__Bacteroidota;c__Bacteroidia;o__Chitinophagales;f__Chitinophagaceae;g__Flaviaesturariibacter;	1.20218894563221e-06	1.73430991320033e-11	1.20218894563221e-06	0	0	0	1	1
k__Bacteria;p__Firmicutes;c__Bacilli;o__Bacillales;f__Bacillaceae;g__Virgibacillus;	1.20218894563221e-06	1.73430991320033e-11	1.20218894563221e-06	0	0	0	1	1
k__Bacteria;p__Bacteroidota;c__Bacteroidia;o__Sphingobacteriales;f__Sphingobacteriaceae;g__Arcticibacter;	0	0	0	1.20218894563221e-06	1.73430991320033e-11	1.20218894563221e-06	1	1
k__Bacteria;p__Proteobacteria;c__Gammaproteobacteria;o__Burkholderiales;f__Oxalobacteraceae;g__Duganella;	1.20218894563221e-06	1.73430991320033e-11	1.20218894563221e-06	0	0	0	1	1
k__Bacteria;p__Bacteroidota;c__Bacteroidia;o__Bacteroidales;f__Prevotellaceae;g__Prevotellaceae_Ga6A1_group;	0	0	0	1.20218894563221e-06	1.73430991320033e-11	1.20218894563221e-06	1	1
k__Bacteria;p__Proteobacteria;c__Gammaproteobacteria;o__Xanthomonadales;f__Xanthomonadaceae;g__Lysobacter;	0	0	0	1.20218894563221e-06	1.73430991320033e-11	1.20218894563221e-06	1	1
Others	0.256923406137896	0.0445753431283231	0.0609476162565875	0.338776844879156	0.0186345928664631	0.0394066331836649	0.274725274725275	0.436454540719944
