# Supplementary material for: Effect of chronic alcohol consumption on oral microbiota in rats with periodontitis
Source: PeerJ journal article supplement (doi:10.7717/peerj.17795), 2024-08-12
Supplement: raw_data.zip [file top_asv_10_genus.xls]

Taxonomy	Rodentibacter	Veillonella	Ralstonia	Bacteroides	Rothia	Streptococcus	Acinetobacter	Delftia	Stenotrophomonas	Corynebacterium	Others
P	0.344890	0.128078	0.001392	0.030909	0.015560	0.060908	0.026666	0.000131	0.000170	0.002727	0.388570
PA	0.364014	0.068191	0.032411	0.052126	0.040599	0.056650	0.012102	0.010716	0.009770	0.010766	0.342655
