# Supplementary material for: Effect of chronic alcohol consumption on oral microbiota in rats with periodontitis
Source: PeerJ journal article supplement (doi:10.7717/peerj.17795), 2024-08-12
Supplement: raw_data.zip [file top_asv_10_phylum.xls]

Taxonomy	Proteobacteria	Firmicutes	Bacteroidota	Actinobacteriota	Desulfobacterota	Cyanobacteria	Chloroflexi	Verrucomicrobiota	Acidobacteriota	Patescibacteria	Others
P	0.731364	0.200128	0.041578	0.024416	0.000262	0.001241	0.000035	0.000099	0.000023	0.000293	0.000561
PA	0.655162	0.176818	0.098016	0.061178	0.003715	0.001018	0.000405	0.000628	0.000298	0.000063	0.002700
