# Supplementary material for: Effect of chronic alcohol consumption on oral microbiota in rats with periodontitis
Source: PeerJ. 2024 Aug 12;12:e17795. doi: 10.7717/peerj.17795 (PMC11326440; doi:10.7717/peerj.17795)
Supplement: Supplemental Information 1 [file peerj-12-17795-s001.xlsx]

## Sheet: Sheet1
	The expression of ALT and AST in rats of each group						分组：group
分组	ID	ALT	AST
P	1	42.5	143.4
P	2	66.6	173.3
P	3	36.6	157.5
P	4	31.9	130.6
P	5	47.4	175.5
P	6	41.8	195.2
P	7	51.9	114.1
P	8	43	158
P	9	45.1	177.5
P	10	35.5	127.9
P	11	45.6	126
P	12	54.8	159.6
PA	13	81.5	168.5
PA	14	94.6	249.6
PA	15	76.4	202.6
PA	16	100.8	194.7
PA	17	94.9	241.8
PA	18	85	218
PA	19	78.3	286.2
PA	20	86.2	208.6
PA	21	77.6	286.1
PA	22	117.8	217.1
PA	23	67.2	183.1
PA	24	78.7	247.9
	the linear distance between the enamel-cemental junction (CEJ) and the alveolar bone crest (ABC)
		lingual	lingual	lingual	buccal	buccal	buccal
		mesial	medium	distal	mesial	medium	distal	average
分组	ID	mm	mm	mm	mm	mm	mm
P	1	0.912	0.884	0.823	0.842	0.82	0.817	0.849667
P	2	1.111	1.245	1.266	1.043	0.985	0.824	1.079
P	3	1.233	0.967	0.994	1.107	0.953	0.899	1.0255
P	4	1.136	0.952	0.938	0.987	1.279	1.225	1.08617
P	5	1.173	0.823	0.812	1.098	1.217	1.196	1.05317
P	6	1.104	0.993	1.095	0.928	1.057	1.084	1.0435
PA	1	0.909	1.251	1.295	1.008	1.109	1.247	1.1365
PA	2	1.205	1.346	1.502	1.375	1.514	1.762	1.45067
PA	3	1.383	1.857	1.691	1.212	1.496	1.72	1.55983
PA	4	1.243	1.065	1.136	1.028	1.175	1.193	1.14
PA	5	1.43807	1.3015	1.15689	1.54252	1.18902	1.02031	1.27472
PA	6	1.254	1.564	1.538	1.376	1.319	1.305	1.39267
